# Supplementary material for: Leveraging multiple transcriptome assembly methods for improved gene structure annotation
Source: PubMed Central journal article supplement (PMC6105091; doi:10.1093/gigascience/giy093), 2018-07-24

# GigaScience

## Leveraging multiple transcriptome assembly methods for improved gene structure annotation

--Manuscript Draft--

|                                                      |                                                                                                                                                                                                                                                                                                                                                                                                                                                                                                                                                                                                                                                                                                                                                                                                                                                |                |
|------------------------------------------------------|------------------------------------------------------------------------------------------------------------------------------------------------------------------------------------------------------------------------------------------------------------------------------------------------------------------------------------------------------------------------------------------------------------------------------------------------------------------------------------------------------------------------------------------------------------------------------------------------------------------------------------------------------------------------------------------------------------------------------------------------------------------------------------------------------------------------------------------------|----------------|
| <b>Manuscript Number:</b>                            | GIGA-D-18-00017R1                                                                                                                                                                                                                                                                                                                                                                                                                                                                                                                                                                                                                                                                                                                                                                                                                              |                |
| <b>Full Title:</b>                                   | Leveraging multiple transcriptome assembly methods for improved gene structure annotation                                                                                                                                                                                                                                                                                                                                                                                                                                                                                                                                                                                                                                                                                                                                                      |                |
| <b>Article Type:</b>                                 | Technical Note                                                                                                                                                                                                                                                                                                                                                                                                                                                                                                                                                                                                                                                                                                                                                                                                                                 |                |
| <b>Funding Information:</b>                          | Biotechnology and Biological Sciences Research Council (GB) (BB/CSP17270/1)                                                                                                                                                                                                                                                                                                                                                                                                                                                                                                                                                                                                                                                                                                                                                                    | Not applicable |
|                                                      | Biotechnology and Biological Sciences Research Council (BB/CCG1720/1)                                                                                                                                                                                                                                                                                                                                                                                                                                                                                                                                                                                                                                                                                                                                                                          | Not applicable |
| <b>Abstract:</b>                                     | <p>Background: The performance of RNA-Seq aligners and assemblers varies greatly across different organisms and experiments, and often the optimal approach is not known beforehand.</p> <p>Results: Here we show that the accuracy of transcript reconstruction can be boosted by combining multiple methods, and we present a novel algorithm to integrate multiple RNA-Seq assemblies into a coherent transcript annotation. Our algorithm can remove redundancies and select the best transcript models according to user-specified metrics, while solving common artefacts such as erroneous transcript chimerisms.</p> <p>Conclusions: We have implemented this method in an open-source Python3 and Cython program, Mikado, available at <a href="https://github.com/luventurini/Mikado">https://github.com/luventurini/Mikado</a>.</p> |                |
| <b>Corresponding Author:</b>                         | David Swarbreck<br>Earlham Institute<br>Norwich, Norfolk UNITED KINGDOM                                                                                                                                                                                                                                                                                                                                                                                                                                                                                                                                                                                                                                                                                                                                                                        |                |
| <b>Corresponding Author Secondary Information:</b>   |                                                                                                                                                                                                                                                                                                                                                                                                                                                                                                                                                                                                                                                                                                                                                                                                                                                |                |
| <b>Corresponding Author's Institution:</b>           | Earlham Institute                                                                                                                                                                                                                                                                                                                                                                                                                                                                                                                                                                                                                                                                                                                                                                                                                              |                |
| <b>Corresponding Author's Secondary Institution:</b> |                                                                                                                                                                                                                                                                                                                                                                                                                                                                                                                                                                                                                                                                                                                                                                                                                                                |                |
| <b>First Author:</b>                                 | Luca Venturini, Ph.D.                                                                                                                                                                                                                                                                                                                                                                                                                                                                                                                                                                                                                                                                                                                                                                                                                          |                |
| <b>First Author Secondary Information:</b>           |                                                                                                                                                                                                                                                                                                                                                                                                                                                                                                                                                                                                                                                                                                                                                                                                                                                |                |
| <b>Order of Authors:</b>                             | Luca Venturini, Ph.D.                                                                                                                                                                                                                                                                                                                                                                                                                                                                                                                                                                                                                                                                                                                                                                                                                          |                |
|                                                      | Shabhonam Caim                                                                                                                                                                                                                                                                                                                                                                                                                                                                                                                                                                                                                                                                                                                                                                                                                                 |                |
|                                                      | Gemy George Kaithakottil                                                                                                                                                                                                                                                                                                                                                                                                                                                                                                                                                                                                                                                                                                                                                                                                                       |                |
|                                                      | Daniel Lee Mapleson                                                                                                                                                                                                                                                                                                                                                                                                                                                                                                                                                                                                                                                                                                                                                                                                                            |                |
|                                                      | David Swarbreck                                                                                                                                                                                                                                                                                                                                                                                                                                                                                                                                                                                                                                                                                                                                                                                                                                |                |
| <b>Order of Authors Secondary Information:</b>       |                                                                                                                                                                                                                                                                                                                                                                                                                                                                                                                                                                                                                                                                                                                                                                                                                                                |                |
| <b>Response to Reviewers:</b>                        | <p>Response to Editor</p> <p>Dear Hans Zauner</p> <p>We have now revised our manuscript addressing the comments of the reviewers. Including those points highlighted by yourself. We note that both reviewers indicated our tool addresses an important issue and thank them for their positive reviews, we have addressed the reviewers remaining queries and provide a point by point response in reply. We also describe additional data included in the revised manuscript, and provide a version with changes to the manuscript highlighted.</p>                                                                                                                                                                                                                                                                                          |                |

Editor comment 1. "One concern I'd like to highlight is the comment of both reviewers regarding the use of outdated tools, such as the assembler - please do consider to replace these with more up-to-date tools."

To address the point relating to our choice of tools (used as an input to our approach and also to assess our method against) we have extended the Daijin pipeline to incorporate HISAT2 (aligner) and Scallop (assembler) and provide an additional supplementary figure (SF9) to show that our approach is amenable to new methods. However we note that the two reviewers queried different tools (reviewer 1 Tophat2, reviewer 2 cufflinks and cuffmerge) when making reference to potentially outdated tools; each of these tools continue to be cited even though new methods are available. Given Mikado is a way of integrating transcript assemblies, we feel it is important to show that our approach can incorporate data from both new and more established assemblers and that the approach is robust to data from methods that overall may not be individually the best. In total the paper evaluates our tool against nine alternative methods. We think this is substantive and believe removing popular tools that provide a familiar reference point would make it harder for gigascience readers to evaluate our method.

Editor comment 2 "Also the advice of reviewer 1 to package the tool with its dependencies e.g. via Bioconda seems a good suggestion to increase usability."

Following the reviewer's suggestion, Mikado and its companion tool Portcullis have been packaged into BioConda, from where they are now available. Mikado is present on the repository with the version used for the analyses in this article (v. 1.0.1) as well as with the updated versions 1.2. We plan to continue releasing future versions of the tool through this channel, as well as through GitHub and PyPI (from where Mikado was already available).

Editor comment 3. "In addition, please register any new software application in the SciCrunch.org database to receive a RRID (Research Resource Identification Initiative ID) number, and include this in your manuscript. This will facilitate tracking, reproducibility and re-use of your tool."

Following the editor's suggestion, Mikado has been registered on SciCrunch, and has been assigned the RRID SCR\_016159. The "Availability of source code and requirements" section has been updated to include both this RRID and the packaging in BioConda.

Reviewer reports:

Reviewer #1

Comment 1. "I can imagine that choosing the correct parameters is quite important to get high quality annotation output. However, this is not clearly described in the manuscript. For instance, how sensitive is the output to different scoring parameters? Will the ranking of mikado relative to other methods critically depend on parameter choice? From the documentation I gather that the scoring definition is quite flexible, which also makes it quite daunting. While I appreciate that careful species-specific optimization of the scoring falls outside the scope of this specific manuscript, but it would be good to at least discuss this."

Mikado by design allows users to fine tune how transcripts will be selected to meet their own requirements, based on our experience of manually annotating genomes and assessing the output of various transcript assembly tools we have attempted to reproduce the choices manual annotators make in our selection of metrics and chosen scoring configuration. The pre-packaged scoring files for the four test species discussed in our manuscript only differ for a few metrics e.g. expected intron sizes, UTR length and proportion of UTR are increased in the human configuration to reflect the different characteristics of human genes. In addition, we increase the flank size for clustering transcripts into superloci for human compared to the more compact Arabidopsis, c.elegans and drosophila genomes. Running with the provided scoring files should represent a good starting point for most projects and we have added a

section to the documentation explain how to configure the scoring ([http://mikado.readthedocs.io/en/latest/Tutorial/Scoring\\_tutorial.html](http://mikado.readthedocs.io/en/latest/Tutorial/Scoring_tutorial.html)) and provide some example use cases (<http://mikado.readthedocs.io/en/latest/Tutorial/Adapting.html>). We now reference the documentation in the section of the manuscript summarising our method and provide a more detailed discussion in the conclusion about how Mikado can be used with different selection criteria and indicate clearly that these choices will influence the final transcript set.

Comment 2. "I strongly suggest that the authors make mikado (and all relevant dependencies) available through bioconda (see <https://doi.org/10.1101/207092>). While mikado itself is easy to install, I had a little more trouble with one of the dependencies (Portcullis)."

Mikado and its companion tool Portcullis have been packaged into BioConda, from where they are now available. Mikado is present on the repository with the version used for the analyses in this article (v. 1.0.1) as well as with the updated versions 1.1 and 1.2.x. We plan to continue releasing future versions of the tool through this channel, as well as through GitHub and PyPI (from where Mikado was already available)

Comment 3. "Is there a reason that Tophat is used instead of HISAT2? It is my understanding that HISAT2 has superseded TopHat2."

We selected two of the most popular aligners available at the point we instigated the project, both STAR and Tophat2 continue to be well cited, with Tophat2 receiving ~1700 citations since 2017 (according to google scholar). We felt both aligners were familiar to potential users of our tool and had been utilised with a range of transcript assemblers by ourselves and others in the literature. We acknowledge that HISAT2 and other more recently published aligners are available and have now incorporated HISAT2 as an option in our Daijin pipeline (that generates the required files for Mikado). We evaluated HISAT2, Tophat2 and STAR as part of assessing our portcullis tool <https://doi.org/10.1101/217620> and while HISAT2 greatly reduced runtime compared to Tophat2, benefits were less clear cut in regard to recall and precision for spliced alignment (Fig 2 <https://doi.org/10.1101/217620>). As we anticipate new read aligners and assemblers will be developed, we have assessed mikado using assemblies generated from HISAT2 and include the recently published Scallop assembler [doi:10.1038/nbt.4020](https://doi.org/10.1038/nbt.4020). These assessments are included as supplementary figure SF9 and referred to in our conclusions to show that our approach is amenable to data from new methods and will continue to offer benefits over approaches using just a single assembler. We show Mikado to be effective with assemblies generated from HISAT2, STAR and Tophat2 so the choice of aligner is not crucial to our method.

Comment 4. "When describing the BLAST-assisted procedure, please also describe in the main text that you use proteins from related species in the benchmark. This is an important detail. I know it is clearly mentioned in the methods section, but I had to specifically look for it."

We have added the following sentence in the results, when explaining which procedure we followed to perform Mikado on the various datasets:

"For each of the four species under analysis, we also obtained reference-quality protein sequences from related species to inform the homology search through BLAST; details on our selection can be found in Table ST4."

Comment 5. "It would be helpful if all accession ids for the sequencing data were clearly mentioned under a header "data availability"."

We now include the accession codes for the sequencing data under the section "Availability of supporting data and materials", with the following text:

"The sequencing runs analysed for this article can be found on ENA, under the accession codes PRJEB7093 (for *A. thaliana*) and PRJEB4208 (for the other three species). The human sequencing data of our parallel Illumina and PacBio experiment can be found under the accession code PRJEB22606."

Comment 6. "p1: one of the most commonly used technology"

Now corrected

Reviewer #2

Comment 1. "Page 2, 1st column, lines 37-40. The authors indicate that Mikado will pick a representative transcript for each locus. It is unclear at this first mention, nor later in the manuscript (page 3, 2nd column, paragraph starting with line 43). I am under the impression that they do not exclude alternatively spliced isoforms that share exons, but the reference to excluding transcripts that overlap the primary transcript could be interpreted as such. Do they mean excluding transcripts that are entirely overlapping (and shorter) with the putative representative transcript? I think clearer language at first mention, and on page 3 would be helpful. "

We agree with the reviewer that our description in the paper could have been clearer. We have amended the first paragraph to

"The software takes as input transcript structures in standard formats such as GTF and GFF3, with optionally BLAST similarity scores or a set of high quality splice junctions. Using this information, Mikado will then define gene loci and their associated transcripts. Each locus will be characterised by a primary transcript - ie the transcript in the region that best fits the requirements specified by the user. If any suitable alternative splicing event for the primary transcript is available, Mikado will add it to the locus. The software is written in python3 and Cython, and extensive documentation is available from <https://mikado.readthedocs.io/>"

In the second paragraph, we have added the following sentences

"After the gene loci and associated primary transcripts have been defined, Mikado will look for potential alternative splicing events. Only transcripts that can be unambiguously assigned to a single gene locus will be considered for this phase. Mikado will add to the locus only transcripts whose structures are non-redundant with those already present, and which are valid alternative splicing events for the primary transcript, as defined by class codes (see <http://mikado.readthedocs.io/en/latest/Usage/Compare.html#class-codes>). Moreover, Mikado will discard any transcript whose score is too low when compared to the primary (by default, only transcripts with a score of 50% or more of the primary will be considered)."

"In the online documentation, we provide a discussion on how to customise scoring files according to the needs of the experimenter, and a tutorial to guide through its creation (<http://mikado.readthedocs.io/en/latest/Tutorial/Adapting.html>)."

We hope that this additional text will make the context clearer to the reader.

Comment 2. "A substantial issue I have is that the authors employ outdated assemblers in their analyses. Cufflinks is notably poor at reconstructing transcripts, and has been replaced by StringTie, both of which were developed by the same group. I would prefer if Cufflinks were excluded entirely, and/or replaced with another transcript assembly tool."

We selected four assembly tools for use in our study, in addition to providing a reference point to evaluate Mikado they are also the input to our tool. We thought it important to show that Mikado was robust to incorporating assemblies from a range of sources and qualities, as such we selected two more recently published assemblers in Stringtie and CLASS that we had used in our own studies and which we believed to perform well (this is now borne out by the results described in our manuscript), in addition we also selected what we considered to be the most popular de novo and reference guided transcript assemblers in Trinity and Cufflinks (Cufflinks has 388 citations this year and nearly 7000 overall). We agree with the reviewer that Cufflinks is inferior to Stringtie and therefore would not be our choice if selecting a single method, however, one of the key arguments for our approach is that even though a method

may overall be inferior it may still reconstruct transcripts missed by other methods. We have now include set analysis of fully reconstructed transcripts showing the intersections between the assembly methods (figure SF4), for each of the four species and two aligners tested, cufflinks identifies between 218 and 1075 transcript not reconstructed fully by any other method, for H.sapiens with Tophat2 alignments Cufflinks generated the highest number of fully-reconstructed transcripts specific to a single method (1058). We believe this merits including cufflinks in our analysis, additionally as a tool still widely used and familiar to gigascience readers we believe it provides a useful reference point. As new methods will continue to be developed we have assessed mikado using assemblies generated from HISAT2 and include the recently published Scallop assembler doi:10.1038/nbt.4020. These assessments are included as supplementary figure SF9 and referred to in our conclusions to show that our approach is amenable to data from new methods and will continue to offer benefits over approaches using just a single assembler.

Added figure SF4 (Upset plots) and the following sentence in the results:

“Closer inspection of the data shows, this effect is not due to a single assembler having greater efficiency; rather, each of the tools is shown to be the only one capable of correctly reconstructing hundreds of the expressed transcripts (Supplementary Figure 4).”

Comment 3. “Page 2, line 13, 2nd column. It should be made clear that the number of "reconstructed transcripts" both in the text and in the legend of figure SF1 is the number of predicted transcripts, not the underlying, true reference transcripts. It becomes clearer a while later when discussing recall and precision, and it should be clear given that more transcripts are predicted for fly than exist in the actual annotation, but, well, best to be as clear as possible!”

We have edited to make this clearer in the text and figure legend

“The number of transcripts assembled varied substantially across methods, with StringTie and Trinity generally reporting a greater number of transcripts (Supplementary Figure SF1)”

Figure SF1: Number of genes and transcripts assembled for each method and species.

Comment 4. “Page 2, 2nd column, line 33. How are "erroneous transcripts" defined? Are they simply real but missing from the genome assembly, or low coverage transcriptional noise? Speaking from experience, I have used de novo transcriptome assemblies to produce valid CDS with strong matches to Uniref peptides that correspond to annotated genes in closely related species.”

We have updated the text to make this clearer

“In contrast, Trinity and StringTie often outperformed the recall of CLASS2, but were also much more prone to yield transcripts absent from the curated public annotations (Supplementary Figure SF2, SF3). Although many of these might be real, yet-unknown transcripts, the high number of chimeric transcripts suggests to treat these novel models with suspicion.”

More generally we agree with the reviewer that the reference annotations will be incomplete and therefore determining true precision based on real data is challenging. We chose species with curated and regularly updated gene sets to provide the best reference annotation for our assessment. In addition the results presented later in the manuscript using simulated reads (where precision can be determined precisely) supports the statement regarding higher precision for CLASS2 over Trinity and Stringtie.

Comment 5. “Is there any flexibility in the nature of the input data provided to Mikado, i.e. could one use splice junctions defined by tools other than Portcullis, etc. Or is the Snakemake pipeline not so flexible in this regard? I ask because new tools are being developed all the time, and allowing to replace tools that Mikado wraps will allow it stay

current well into the future.”

We agree with the reviewer that the field is very dynamic, with the popularity and usefulness of tools changing very quickly. To prevent obsolescence, Mikado was written so that it can accept input from any assembler as long as it follows the very widespread and standard GTF, GFF3 or BED12 file formats. The “prepare” step of the pipeline will then uniform the data contained in these files. With regard to the set of reliable splice junctions, these can be generated by any method and provided in BED12 format. The Mikado part of the Daijin pipeline should therefore be robust to development in the field; as long as the input files are in a supported format Mikado will be able to use them. This flexibility allows Mikado to be applied in different contexts; although it is outside of the scope of this article, in a different project we applied Mikado to merge and select from two ab initio prediction datasets. This was possible thanks to the agnostic nature of the first step. The first part of the Daijin pipeline, which is tasked with aligning and assembling reads i.e. generating the input for Mikado, includes prescribed options for both alignment and assembly. However, new tools can be added to the workflow quite easily - as is typical with the SnakeMake pipelines, adding a rule will in most cases suffice. The code is public, and we plan to add other tools in time; for example, we recently added Scallop.

Comment 6. “In the Performance of Mikado section, there is a reference to the low coverage filter for CLASS2 that allows it perform better in a particular case. In the next section, the authors refer to Mikado’s ability to do such filtering. In the Performance section, they should edit to say something to the effect of , “Mikado can be implemented using coverage and other filters to improve assembly performance (as described in the next section).”

The sections the reviewer is referring to do not address the same issue. The reference to CLASS2 is in relation to it’s higher precision by virtue of not assembling models from intronic sequences that were incorrectly assembled by other methods. The next section on filtering lenient assemblies relates specifically to generating transcript assemblies with a lower minimum isoform fraction and using Mikado to filter these. It would be possible to configure Mikado to reduce the number of intronic fragments based on filtering for low coverage but Mikado does not “out of the box” use coverage to score or select transcripts. We do enable the user to provide external metrics (<http://mikado.readthedocs.io/en/latest/Algorithms.html?highlight=external-metrics#external-metrics>) that could then be used to score coverage/expression and used in conjunction with how Mikado identifies and excludes what we refer to as fragments (section 8.1 <http://mikado.readthedocs.io/en/latest/Algorithms.html#picking-transcripts-how-to-define-loci-and-their-members>). We have updated the text to provide reference to this.

“While Mikado does not calculate or utilise coverage to score and select transcripts, we do make provision for externally generated metrics that could be used in conjunction with Mikado’s fragment filtering to screen out lowly expressed intronic models.”

Comment 7. “Also in the Performance section, similar to my complaint about Cufflinks above, CuffMerge is an outdated tool.”

We disagree with the reviewer that cuffmerge is an outdated tool as part of the same suite as cufflinks this set of tools continue to be well cited (see earlier reply). In the section describing multi sample transcript reconstruction we assessed Mikado against four alternative methods of which cuffmerge is one. We selected a recently published tool in TACO developed specifically for this purpose, established tools in StringtieMerge and CuffMerge, and based on our own positive experience EvidentialGene. While not the best performing tool in any context, cuffmerge did generate higher F1 scores than alternative methods on some of the datasets used. We believe this merits its inclusion and that the four methods provide a good reference point to assess our own tool against. We do not see that the manuscript would be improved by excluding the cuffmerge results.

Comment 8. “Page 5, column 2, ~ line 36, reference to Figure SF8 should be to Figure SF7”.

|                                                                                                                                 |                                                                                                                                                                                                                                                                                                                                                                                                                                                                                                                                                                                                                                                                                                                                                                                                                                                                                                                                                                                                                                                                                                                                                                                                                                                                                                                                                                                                                                                                                                                                                                                                                                                                                                                                                                                                                                                                                                                                                                                                                                                                                                                                                                                                                                                                                                                                                                                                                                                                                                                                                                                                                                                                                                                                                                                                                                                                                                                                                                                                                                                                                                                                                                                                                                                                                                                                                                                                                                                                                                                                                                                                                                                                                                                                                                                                                                                                                                                                                        |
|---------------------------------------------------------------------------------------------------------------------------------|--------------------------------------------------------------------------------------------------------------------------------------------------------------------------------------------------------------------------------------------------------------------------------------------------------------------------------------------------------------------------------------------------------------------------------------------------------------------------------------------------------------------------------------------------------------------------------------------------------------------------------------------------------------------------------------------------------------------------------------------------------------------------------------------------------------------------------------------------------------------------------------------------------------------------------------------------------------------------------------------------------------------------------------------------------------------------------------------------------------------------------------------------------------------------------------------------------------------------------------------------------------------------------------------------------------------------------------------------------------------------------------------------------------------------------------------------------------------------------------------------------------------------------------------------------------------------------------------------------------------------------------------------------------------------------------------------------------------------------------------------------------------------------------------------------------------------------------------------------------------------------------------------------------------------------------------------------------------------------------------------------------------------------------------------------------------------------------------------------------------------------------------------------------------------------------------------------------------------------------------------------------------------------------------------------------------------------------------------------------------------------------------------------------------------------------------------------------------------------------------------------------------------------------------------------------------------------------------------------------------------------------------------------------------------------------------------------------------------------------------------------------------------------------------------------------------------------------------------------------------------------------------------------------------------------------------------------------------------------------------------------------------------------------------------------------------------------------------------------------------------------------------------------------------------------------------------------------------------------------------------------------------------------------------------------------------------------------------------------------------------------------------------------------------------------------------------------------------------------------------------------------------------------------------------------------------------------------------------------------------------------------------------------------------------------------------------------------------------------------------------------------------------------------------------------------------------------------------------------------------------------------------------------------------------------------------------------|
|                                                                                                                                 | <p>The reviewer was indeed correct in pointing this out. However, since we added a new Supplementary Figure (SF4), the numbering of following figures was changed as well. We have checked and revised as needed the numbering throughout the manuscript. In this specific case, the new correct numbering is indeed SF8.</p> <p>Comment 9. "Is there a plan for further development (and debugging if necessary) of Mikado, and user support (e.g. via a Google discussion group, etc.)? Too many potentially valuable bioinformatics projects have an effective lifespan of the doctoral or postdoctoral programs of the primary developers, with empty wiki pages that say "coming soon" that haven't been updated in years. "</p> <p>The reviewer is indeed correct in pointing out that too many tools in the bioinformatics are developed and then left to languish. Regarding the current levels of user support and development, we can point to our levels of support through the "Issues" page on the GitHub project (<a href="https://github.com/lucventurini/mikado/issues?utf8=%E2%9C%93&amp;q=is%3Aissue+">https://github.com/lucventurini/mikado/issues?utf8=%E2%9C%93&amp;q=is%3Aissue+</a>), which is our main point of collection for bug reports and feature requests. We try to be active in replying to our user-base and correct bugs as quickly as possible. Software development is also active; we released two major releases in the past year, and do not plan to end development any time soon. In more general terms, Mikado has been created with the purpose of being central in the annotation pipelines developed at our institute, not just as a postdoctoral project. As such, our institute is committed to continue the maintenance and the development of the software tool irrespective of the professional fate of the manuscript's authors. For this reason, we strived to document extensively the code base, follow formally correct software writing style, and include extensive unit and system-test coverage. These provisions, and the nature of Mikado as an important key for future annotation pipelines of the institute, should make the tool much more robust than most.</p> <p>Comment 10. "With respect to parameter tuning for Mikado Pick described on page 8, it would be useful to provide some guidelines re: deviating from the default scoring scheme, perhaps by a short paragraph on the matter, and then an expanded discussion on gh the github page. With more and more groups assembling genomes and needing to annotate them, the researchers launching annotation analyses probably will not have the depth of bioinformatics experience to do a good job of changing scoring schemes, leading to use of default settings that may lead to sub-optimal settings. A simple tutorial/walkthrough page on the github repo would get such groups on the right track."</p> <p>The pre-packaged scoring files for the four test species discussed in our manuscript only differ for a few metrics e.g. expected intron sizes, UTR length and proportion of UTR are increased in the human configuration to reflect the different characteristics of human genes. In addition, we increase the flank size for clustering transcripts into superloci for human compared to the more compact arabidopsis, c.elegans and drosophila genomes. Running with the provided scoring files should represent a good starting point for most projects and we have added a section to the documentation explain how to configure the scoring file (<a href="http://mikado.readthedocs.io/en/latest/Tutorial/Scoring_tutorial.html">http://mikado.readthedocs.io/en/latest/Tutorial/Scoring_tutorial.html</a>) and giving some example use cases (<a href="https://mikado.readthedocs.io/en/latest/Tutorial/Adapting.html">https://mikado.readthedocs.io/en/latest/Tutorial/Adapting.html</a>).</p> |
| <b>Additional Information:</b>                                                                                                  |                                                                                                                                                                                                                                                                                                                                                                                                                                                                                                                                                                                                                                                                                                                                                                                                                                                                                                                                                                                                                                                                                                                                                                                                                                                                                                                                                                                                                                                                                                                                                                                                                                                                                                                                                                                                                                                                                                                                                                                                                                                                                                                                                                                                                                                                                                                                                                                                                                                                                                                                                                                                                                                                                                                                                                                                                                                                                                                                                                                                                                                                                                                                                                                                                                                                                                                                                                                                                                                                                                                                                                                                                                                                                                                                                                                                                                                                                                                                                        |
| <b>Question</b>                                                                                                                 | <b>Response</b>                                                                                                                                                                                                                                                                                                                                                                                                                                                                                                                                                                                                                                                                                                                                                                                                                                                                                                                                                                                                                                                                                                                                                                                                                                                                                                                                                                                                                                                                                                                                                                                                                                                                                                                                                                                                                                                                                                                                                                                                                                                                                                                                                                                                                                                                                                                                                                                                                                                                                                                                                                                                                                                                                                                                                                                                                                                                                                                                                                                                                                                                                                                                                                                                                                                                                                                                                                                                                                                                                                                                                                                                                                                                                                                                                                                                                                                                                                                                        |
| Are you submitting this manuscript to a special series or article collection?                                                   | No                                                                                                                                                                                                                                                                                                                                                                                                                                                                                                                                                                                                                                                                                                                                                                                                                                                                                                                                                                                                                                                                                                                                                                                                                                                                                                                                                                                                                                                                                                                                                                                                                                                                                                                                                                                                                                                                                                                                                                                                                                                                                                                                                                                                                                                                                                                                                                                                                                                                                                                                                                                                                                                                                                                                                                                                                                                                                                                                                                                                                                                                                                                                                                                                                                                                                                                                                                                                                                                                                                                                                                                                                                                                                                                                                                                                                                                                                                                                                     |
| <b>Experimental design and statistics</b>                                                                                       | Yes                                                                                                                                                                                                                                                                                                                                                                                                                                                                                                                                                                                                                                                                                                                                                                                                                                                                                                                                                                                                                                                                                                                                                                                                                                                                                                                                                                                                                                                                                                                                                                                                                                                                                                                                                                                                                                                                                                                                                                                                                                                                                                                                                                                                                                                                                                                                                                                                                                                                                                                                                                                                                                                                                                                                                                                                                                                                                                                                                                                                                                                                                                                                                                                                                                                                                                                                                                                                                                                                                                                                                                                                                                                                                                                                                                                                                                                                                                                                                    |
| Full details of the experimental design and statistical methods used should be given in the Methods section, as detailed in our |                                                                                                                                                                                                                                                                                                                                                                                                                                                                                                                                                                                                                                                                                                                                                                                                                                                                                                                                                                                                                                                                                                                                                                                                                                                                                                                                                                                                                                                                                                                                                                                                                                                                                                                                                                                                                                                                                                                                                                                                                                                                                                                                                                                                                                                                                                                                                                                                                                                                                                                                                                                                                                                                                                                                                                                                                                                                                                                                                                                                                                                                                                                                                                                                                                                                                                                                                                                                                                                                                                                                                                                                                                                                                                                                                                                                                                                                                                                                                        |

|                                                                                                                                                                                                                                                                                                                                                                                                                                                                                                                                                         |            |
|---------------------------------------------------------------------------------------------------------------------------------------------------------------------------------------------------------------------------------------------------------------------------------------------------------------------------------------------------------------------------------------------------------------------------------------------------------------------------------------------------------------------------------------------------------|------------|
| <p><a href="#">Minimum Standards Reporting Checklist.</a><br/>Information essential to interpreting the data presented should be made available in the figure legends.</p> <p>Have you included all the information requested in your manuscript?</p>                                                                                                                                                                                                                                                                                                   |            |
| <p><b>Resources</b></p> <p>A description of all resources used, including antibodies, cell lines, animals and software tools, with enough information to allow them to be uniquely identified, should be included in the Methods section. Authors are strongly encouraged to cite <a href="#">Research Resource Identifiers</a> (RRIDs) for antibodies, model organisms and tools, where possible.</p> <p>Have you included the information requested as detailed in our <a href="#">Minimum Standards Reporting Checklist</a>?</p>                     | <p>Yes</p> |
| <p><b>Availability of data and materials</b></p> <p>All datasets and code on which the conclusions of the paper rely must be either included in your submission or deposited in <a href="#">publicly available repositories</a> (where available and ethically appropriate), referencing such data using a unique identifier in the references and in the “Availability of Data and Materials” section of your manuscript.</p> <p>Have you have met the above requirement as detailed in our <a href="#">Minimum Standards Reporting Checklist</a>?</p> | <p>Yes</p> |



Click here to view linked References

Placeholder for  
OUP logo  
oup.pdf

Placeholder for  
journal logo  
gigascience-  
logo.pdf

doi: xx.xxxx/xxxx

Manuscript in Preparation  
Paper

PAPER

# Leveraging multiple transcriptome assembly methods for improved gene structure annotation

Luca Venturini<sup>1</sup>, Shabhonam Caim<sup>1,2</sup>, Gemy George Kaithakottil<sup>1</sup>, Daniel Lee Mapleson<sup>1</sup> and David Swarbreck<sup>1,\*</sup>

<sup>1</sup>Earlham Institute, Norwich Research Park, NR47UZ, Norwich, United Kingdom and <sup>2</sup>Quadram Institute Biosciences, Norwich Research Park, NR47UA, Norwich, United Kingdom

\* david.swarbreck@earlham.ac.uk

## Abstract

**Background** The performance of RNA-Seq aligners and assemblers varies greatly across different organisms and experiments, and often the optimal approach is not known beforehand. **Results** Here we show that the accuracy of transcript reconstruction can be boosted by combining multiple methods, and we present a novel algorithm to integrate multiple RNA-Seq assemblies into a coherent transcript annotation. Our algorithm can remove redundancies and select the best transcript models according to user-specified metrics, while solving common artefacts such as erroneous transcript chimerisms. **Conclusions** We have implemented this method in an open-source Python3 and Cython program, Mikado, available at <https://github.com/luventurini/Mikado>.

**Key words:** RNA-Seq, transcriptome, assembly, genome annotation

## Background

The annotation of eukaryotic genomes is typically a complex process which integrates multiple sources of extrinsic evidence to guide gene predictions. Improvements and cost reductions in the field of nucleic acid sequencing now make it feasible to generate a genome assembly and to obtain deep transcriptome data even for non-model organisms. However, for many of these species often there are only minimal EST and cDNA resources and limited availability of proteins from closely related species. In these cases, transcriptome data from high-throughput RNA sequencing (RNA-Seq) provides a vital source of evidence to aid gene structure annotation. A detailed map of the transcriptome can be built from a range of tissues, developmental stages and conditions, aiding the annotation of transcription start sites, exons, alternative splice variants and polyadenylation sites.

Currently, one of the most commonly used technologies for RNA-Seq is Illumina sequencing, which is characterised by extremely high throughput and relatively short read lengths. Since its introduction, numerous algorithms have been pro-

posed to analyse its output. Many of these tools focus on the problem of assigning reads to known genes to infer their abundance [1, 2, 3, 4], or of aligning them to their genomic locus of origin [5, 6, 7]. Another challenging task is the reconstruction of the original sequence and genomic structure of transcripts directly from sequencing data. Many approaches developed for this purpose leverage genomic alignments [8, 9, 10, 11], although there are alternatives based instead on *de novo* assembly [9, 12, 13]. While these methods focus on how to analyse a single dataset, related research has examined how to integrate assemblies from multiple samples. While some researchers advocate for merging together reads from multiple samples and assembling them jointly [9], others have developed methods to integrate multiple assemblies into a single coherent annotation [8, 14].

The availability of multiple methods has generated interest in understanding the relative merits of each approach [15, 16, 17]. The correct reconstruction of transcripts is often hampered by the presence of multiple isoforms at each locus and the extreme variability of expression levels, and therefore in sequencing depth, within and across gene loci. This variabil-

Compiled on: May 11, 2018.

Draft manuscript prepared by the author.

ity also affects the correct identification of transcription start and end sites, as sequencing depth typical drops near the terminal ends of transcripts. The issue is particularly severe in compact genomes, where genes are clustered within small intergenic distances. Further, the presence of tandemly duplicated genes can lead to alignment artefacts that then result in multiple genes being incorrectly reconstructed as a fused transcript. As observed in a comparison performed by the RGASP consortium [18], the accuracy of each tool depends on how it corrects for each of these potential sources of errors. However, it also depends on other external factors such as the quality of the input sequencing data as well as on species-dependent characteristics, such as intron sizes and the extent of alternative splicing. It has also been observed that no single method consistently delivers the most accurate transcript set when tested across different species. Therefore, none of them can be determined *a priori* as the most appropriate for a given experiment [19]. These considerations are an important concern in the design of genome annotation pipelines, as transcript assemblies are a common component of evidence guided approaches that integrate data from multiple sources (e.g. cDNAs, protein or whole genome alignments). The quality and completeness of the assembled transcript set can therefore substantially impact on downstream annotation.

Following these studies, various approaches have been proposed to determine the best assembly using multiple measures of assembly quality [20, 19] or to integrate RNA-Seq assemblies generated by competing methods [21, 22, 23]. In this study we show that alternative methods not only have different strengths and weaknesses, but that they also often complement each other by correctly reconstructing different subsets of transcripts. Therefore, methods that are not the best overall might nonetheless be capable of outperforming the “best” method for a sub-set of loci. An annotation project typically integrates datasets from a range of tissues or conditions, or may utilise public data generated with different technologies (e.g. Illumina, PacBio) or sequencing characteristics (e.g. read length, strand specificity, ribo-depletion); in such cases, it is not uncommon to produce at least one set of transcript assemblies for each of the different sources of data, assemblies which then need to be reconciled. To address these challenges, we developed MIKADO, an approach to integrate transcript assemblies. The tool defines loci, scores transcripts, determines a representative transcript for each locus, and finally returns a set of gene models filtered to individual requirements, for example removing transcripts that are chimeric, fragmented or with short or disrupted coding sequences. Our approach was shown to outperform both stand-alone methods and those that combine assemblies, by returning more transcripts reconstructed correctly and less chimeric and unannotated genes.

## Results and discussion

### Assessment of RNA-Seq based transcript reconstruction methods

We evaluated the performance of four commonly utilised transcript assemblers: Cufflinks, StringTie, CLASS2 and Trinity. Their behaviour was assessed in four species, using as input data RNA-Seq reads aligned with two alternative leading aligners, TopHat2 and STAR. In total, we generated 32 different transcript assemblies, eight per species. In line with the previous RGASP evaluation, we performed our tests on the three metazoan species of *Caenorhabditis elegans*, *Drosophila melanogaster* and *Homo sapiens*, using RNA-Seq data from that study as input. We also added to the panel a plant species, *Arabidopsis thaliana*, to assess the performance of these tools on a non-metazoan

genome. Each of these species has undergone extensive manual curation to refine gene structures, and moreover, these annotations exhibit very different gene characteristics in terms of their proportion of single exon genes, average intron lengths and number of annotated transcripts per gene (Supplementary Table ST1). Similar to previous studies [18, 24], we based our initial assessment on real rather than simulated data, to ensure we captured the true characteristics of RNA-Seq data. Prediction performance was benchmarked against the subset of annotated transcripts with all exons and introns (minimum 1X coverage) identified by at least one of the two RNA-Seq aligners.

The number of transcripts assembled varied substantially across methods, with StringTie and Trinity generally reporting a greater number of transcripts (Supplementary Figure SF1). Assembly with Trinity was performed using the genome guided *de-novo* method, where RNA-Seq reads are first partitioned into loci ahead of *de-novo* assembly. This approach is in contrast to the genome guided approaches employed by the other assemblers that allow small drops in read coverage to be bridged and enable the exclusion of retained introns and other lowly expressed fragments. As expected Trinity annotated more fragmented loci, with a higher proportion of mono-exonic genes (Supplementary Figure SF1).

Accuracy of transcript reconstruction was measured using recall and precision. For any given feature (nucleotide, exon, transcript, gene), recall is defined as the percentage of correctly predicted features out of all expressed reference features, whereas precision is defined as the percentage of all features that correctly match a feature present in the reference. In line with previous evaluations, we found that accuracy varied considerably among methods, with clear trade-offs between recall and precision (Supplementary Figure SF2). For instance, CLASS2 emerged as the most precise of all methods tested, but its precision came at the cost of reconstructing less transcripts overall. In contrast, Trinity and StringTie often outperformed the recall of CLASS2, but were also much more prone to yield transcripts absent from the curated public annotations (Supplementary Figure SF2, SF3). Although many of these might be real, yet-unknown transcripts, the high number of chimeric transcripts suggests to treat these novel models with suspicion. Notably, the performance and the relative ranking of the methods differed among the four species (Table 1). We found CLASS2 and StringTie to be overall the most accurate (with either aligner), however exceptions were evident. For instance, the most accurate method in *D. melanogaster* (CLASS2 in conjunction with Tophat alignments) performed worse than any other tested method in *A. thaliana*. The choice of RNA-Seq aligner also substantially impacted assembly accuracy, with clear differences between the two when used in conjunction with the same assembler.

Across the four species and depending on the aligner used, 22 to 35% of transcripts could be reconstructed by any combination of aligner and assembler (Supplementary Table ST2). However, some genes were recovered only by a subset of the methods (Supplementary Table ST2), with on average 5% of the genes being fully reconstructable only by one of the available combinations of aligner and assembler. Closer inspection of the data shows that this effect is not due to a single assembler having greater efficiency; rather, each of the tools is shown to be the only one capable of correctly reconstructing hundreds of the expressed transcripts (Supplementary Figure SF4). Taking the union of genes fully reconstructed by any of the methods shows that an additional 14.92–19.08% of genes could be recovered by an approach that would integrate the most sensitive assembly with less comprehensive methods. This complementarity manifests as well in relation to genes missed by any particular method: while each approach failed to reconstruct

**Table 1.** Cumulative z-score for each method aggregating individual z-scores based on base, exon, intron, intron chain, transcript and gene F1 score (top ranked method in bold, bottom ranked method underlined and in italics).

| Method              | <i>A. thaliana</i> |          | <i>C. elegans</i> |          | <i>D. melanogaster</i> |          | <i>H. sapiens</i> |          | All methods   |          |
|---------------------|--------------------|----------|-------------------|----------|------------------------|----------|-------------------|----------|---------------|----------|
|                     | Z-score            | Rank     | Z-score           | Rank     | Z-score                | Rank     | Z-score           | Rank     | Z-score       | Rank     |
| CLASS2 (STAR)       | <b>7.627</b>       | <b>1</b> | <b>7.309</b>      | <b>1</b> | -3.310                 | 6        | <b>5.258</b>      | <b>1</b> | <b>16.884</b> | <b>1</b> |
| StringTie (TopHat2) | 0.584              | 4        | 5.502             | 3        | 6.612                  | 2        | 3.199             | 3        | 15.897        | 2        |
| CLASS2 (TopHat2)    | <u>-5.542</u>      | <u>8</u> | 6.698             | 2        | <b>9.314</b>           | <b>1</b> | 4.998             | 2        | 15.738        | 3        |
| StringTie (STAR)    | 2.621              | 3        | -2.197            | 4        | 1.587                  | 3        | 2.991             | 4        | 5.001         | 4        |
| Cufflinks (STAR)    | 2.716              | 2        | -2.306            | 5        | -1.730                 | 5        | 1.037             | 5        | -0.283        | 5        |
| Cufflinks (TopHat2) | -0.526             | 5        | <u>-5.363</u>     | <u>8</u> | -1.504                 | 4        | -0.993            | 6        | -8.386        | 6        |
| Trinity (STAR)      | -4.120             | 7        | -5.079            | 7        | -4.762                 | 7        | -3.417            | 7        | -17.458       | 7        |
| Trinity (TopHat2)   | -3.280             | 6        | -4.833            | 6        | <u>-6.206</u>          | <u>8</u> | <u>-13.073</u>    | <u>8</u> | -27.392       | <u>8</u> |

several hundred genes on average, the majority of these models could be fully or partially reconstructed by an alternative method (Supplementary Figure SF3A). Another class of error are artifactual fusion/chimeric transcripts that chain together multiple genes. These artefacts usually arise from an incorrect identification of start and end sites during transcript reconstruction - an issue which appears most prominently in compact genomes with smaller intergenic distances [9]. Among the methods tested, Cufflinks was particularly prone to this class of error, while Trinity and CLASS2 assembled far fewer such transcripts. Again, alternative methods complemented each other, with many genes fused by one assembler being reconstructed correctly by another approach (Supplementary Figure SF3B). Finally, the efficiency of transcript reconstruction depends on coverage, a reflection of sequencing depth and expression level. Methods in general agree on the reconstruction of well-expressed genes, while they show greater variability with transcripts that are present at lower expression levels. Even at high expression levels, though, only a minority of genes can be reconstructed correctly by every tested combination of aligner and assembler (Supplementary Figure SF5). Our results underscore the difficulty of transcript assembly and highlight advantageous features of specific methods. A naive combination of the output of all methods would yield the greatest sensitivity, but at the cost of a decrease in precision as noise from erroneous reconstructions accumulates. Indeed, this is what we observe: in all species, while the recall of the naive combination markedly improves even upon the most sensitive method, the precision decreases (Supplementary Figure SF2). As transcript reconstruction methods exhibit idiosyncratic strengths and weaknesses an approach that can integrate multiple assemblies can potentially lead to a more accurate and comprehensive set of gene models.

## Overview of the Mikado method

Mikado provides a framework for integrating transcripts from multiple sources into a consolidated set of gene annotations. Our approach assesses, scores (based on user configurable criteria) and selects transcripts from a larger transcript pool, leveraging transcript assemblies generated by alternative methods or from multiple samples and sequencing technologies.

The software takes as input transcript structures in standard formats such as GTF and GFF3, with optionally BLAST similarity scores or a set of high quality splice junctions. Using this information, Mikado will then define gene loci and their associated transcripts. Each locus will be characterised by a primary transcript - ie the transcript in the region that best fits the requirements specified by the user, and which therefore receives the highest score. If any suitable alternative splicing event for the primary transcript is available, Mikado will add it to the locus. The software is written in python3 and Cython, and extensive documentation is available from

<https://mikado.readthedocs.io/>.

Mikado is composed of three core programs (prepare, serialise, pick) executed in series. The Mikado prepare step validates and standardizes transcripts, removing exact duplicates and artifactual assemblies such as those with ambiguous strand orientation (as indicated by canonical splicing). During the Mikado serialise step, data from multiple sources are brought together inside a common database. Mikado by default analyses and integrates three types of data: open-reading frames (ORFs) currently identified via TransDecoder, protein similarity derived through BLASTX or Diamond and high quality splice junctions identified using tools such as Portcullis [25] or Stampy [26]. The selection phase (Mikado pick) groups transcripts into loci and calculates for each transcript over fifty numerical and categorical metrics based on either external data (e.g. BLAST support) or intrinsic qualities relating to CDS, exon, intron or UTR features (summarised in Supplementary Table T3).

While some metrics are inherent to each transcript (e.g. the cDNA length), others depend on the context of the locus the transcript is placed in. A typical example would be the proportion of introns of the transcript relative to the number of introns associated to the genomic locus. Such values are dependent on the loci grouping, and can change throughout the computation, as transcripts are moved into a different locus or filtered out. Notably, the presence of open reading frames is used in conjunction with protein similarity to identify and resolve fusion transcripts. Transcripts with multiple ORFs are marked as candidate false-fusions; homology to reference proteins is then optionally used to determine whether the ORFs derive from more than one gene. If the fusion event is confirmed, the transcript is split into multiple transcripts (Figure 1).

**Figure 1.** The algorithm employed by Mikado is capable of solving complex loci, with multiple potential assemblies. This locus in *A. thaliana* is particularly challenging as an ancestral gene in the locus tandemly duplicated into the current AT5G66610, AT5G66620 and AT5G66630 genes. Due to these difficulties, no single assembler was capable of reconstructing correctly all loci. For instance, Trinity was the only method which correctly assembled AT5G66631, but it failed to reconstruct correctly any other transcript. The reverse was true for Cufflinks, which correctly assembled the three duplicated genes, but completely missed the monoexonic AT566631. By choosing between different alternative assemblies, Mikado was capable to provide an evidence-based annotation congruent to the TAIR10 models.

To determine the primary transcript at a locus, Mikado assigns a score for each metric of each transcript, by assessing its value relatively to all other transcripts associated to the locus. Once the highest scoring transcript for the group has been selected, Mikado will exclude all transcripts which are directly intersecting it, and if any remain, iteratively select the next best scoring transcripts pruning the graph until all

1 non-intersecting transcripts have been selected. This iterative  
2 strategy ensures that no locus is excluded if e.g. there are  
3 unresolved read-through events that would connect two or  
4 more gene loci. Grouping and filtering happen in multiple se-  
5 quential phases, each defined by different rules for clustering  
6 transcripts into loci (see methods). After the gene loci and  
7 associated primary transcripts have been defined, Mikado will  
8 look for potential alternative splicing events. Only transcripts  
9 that can be unambiguously assigned to a single gene locus will  
10 be considered for this phase. Mikado will add to the locus only  
11 transcripts whose structures are non-redundant with those  
12 already present, and which are valid alternative splicing events  
13 for the primary transcript, as defined by the by class codes (see  
14 <http://mikado.readthedocs.io/en/latest/Usage/Compare.html#class-codes>).  
15 Moreover, Mikado will discard any transcript whose score  
16 is too low when compared to the primary (by default, only  
17 transcripts with a score of 50% or more of the primary  
18 transcript will be considered). The process is controlled by  
19 a configuration file that determines desirable gene features,  
20 allowing the user to define criteria for transcript filtering  
21 and scoring as well as specifying minimum requirements for  
22 potential alternative splicing events. The online documenta-  
23 tion contains details on the format of the configuration file  
24 ([http://mikado.readthedocs.io/en/latest/Tutorial/Scoring\\_tutorial.html](http://mikado.readthedocs.io/en/latest/Tutorial/Scoring_tutorial.html))  
25 and provides a tutorial on how to create such  
26 files or adapt existing ones to new projects  
27 (<http://mikado.readthedocs.io/en/latest/Tutorial/Adapting.html>).

28 Candidate isoforms will be ranked according to their score  
29 and considered in decreasing order, with a cap on the max-  
30 imum number of alternative isoforms and on the minimum  
31 score for a candidate to be considered valid (by default, at a  
32 minimum 50% of the score of the primary transcript). Mikado  
33 will add to the locus only transcripts whose structures are non-  
34 redundant with those already present, and which are valid al-  
35 ternative splicing events for the primary transcript, as defined  
36 by class codes (see ). The process is controlled by a configura-  
37 tion file that determines desirable gene features, allowing the  
38 user to define criteria for transcript filtering and scoring as well  
39 as specifying minimum requirements for potential alternative  
40 splicing events.

41 We also developed a Snakemake-based pipeline, Daijin, in  
42 order to drive Mikado, including the calls to external programs  
43 to calculate ORFs and protein homology. Daijin works in two  
44 independent stages, assemble and mikado. The former stage  
45 enables transcript assemblies to be generated from the read  
46 datasets using a choice of read alignment and assembly meth-  
47 ods. In parallel, this part of the pipeline will also calculate  
48 reliable junctions for each alignment using Portcullis. The lat-  
49 ter stage of the pipeline drives the steps necessary to execute  
50 Mikado, both in terms of the required steps for our program  
51 (prepare, serialise, pick) and of the external programs needed  
52 to obtain additional data for the picking stage (currently, ho-  
53 mology search and ORF detection). A summary of the Daijin  
54 pipeline is reported in Figure 2.

55 Figure 2. Schematic representation of the Mikado workflow.

## 56 Performance of Mikado

57 To provide a more complete assessment we evaluated the per-  
58 formance of Mikado on both simulated and real data. While real  
59 data represents more fully the true complexity of the transcrip-  
60 tome simulated data generates a known set of transcripts to  
61 enable a precise assessment of prediction quality. For our pur-

1 poses, we used SPANKI to simulate RNA-Seq reads for all four  
2 species, closely matching the quality and expression profiles  
3 of the corresponding real data. Simulated reads were aligned  
4 and assembled following the same protocol that was used for  
5 real data, above. For each of the four species under analysis,  
6 we also obtained reference-quality protein sequences from re-  
7 lated species to inform the homology search through BLAST;  
8 details on our selection can be found in Table ST4. Mikado was  
9 then used to integrate the four different transcript assemblies  
10 for each alignment.

11 Across the four species and on both simulated and real data,  
12 Mikado was able to successfully combine the different assem-  
13 blies, obtaining a higher accuracy than most individual tools in  
14 isolation. Compared with the best overall combination, CLASS2  
15 on STAR alignments, Mikado improved the accuracy on aver-  
16 age by 6.58% and 9.23% on simulated and real data at the  
17 transcript level, respectively (Figure 3 and Additional File 2).  
18 Most of this improvement accrues due to an improved recall  
19 rate without significant losses on precision. We register a sin-  
20 gle exception, on *H. sapiens* simulated data, due to an excess of  
21 intronic gene models which pervade the assemblies of all other  
22 tools. On simulated data, CLASS2 is able to detect these models  
23 and exclude them, most probably using its refined filter on low-  
24 coverage regions [11]; however, this increase in precision is ab-  
25 sent when using TopHat2 as an aligner and on real data. While  
26 Mikado does not calculate or utilise coverage to score and se-  
27 lect transcripts, we do make provision for externally generated  
28 metrics that could be used in conjunction with Mikado's frag-  
29 ment filtering to screen out lowly expressed intronic models.  
30 Aside from the accuracy in correctly reconstructing transcript  
31 structures, in our experiments, merging and filtering the as-  
32 semblies proved an effective strategy to produce a comprehen-  
33 sive transcript catalogue: Mikado consistently retrieved more  
34 loci than the most accurate tools, while avoiding the sharp drop  
35 in precision of more sensitive methods such as e.g. Trinity  
36 (Figure 3b). Finally, Mikado was capable to accurately identify  
37 and solve cases of artefactual gene fusions, which mar the per-  
38 formance of many assemblers. As this kind of error is more  
39 prevalent in our real data, the increase in precision obtained  
40 by using Mikado was greater using real rather than simulated  
41 data.

42 Figure 3. Performance of Mikado on simulated and real data. a We evaluated  
43 the performance of Mikado using both simulated data and the original real data.  
44 The method with the best transcript-level F1 is marked by a circle. b Number  
45 of reconstructed, missed and chimeric genes in each of the assemblies. Notice  
46 the lower level of chimeric events in simulated data.

47 We further assessed the performance of Mikado in com-  
48 parison with three other methods that are capable of inte-  
49 grating transcripts from multiple sources: CuffMerge [27],  
50 StringTie-merge [14] and EvidentialGene [23, 28]. CuffMerge  
51 and StringTie-merge perform a meta-assembly of transcript  
52 structures, without considering ORFs or homology. In con-  
53 trast, EvidentialGene is similar to Mikado in that it classifies  
54 and selects transcripts, calculating ORFs and associated quality  
55 metrics from each transcript to inform its choice. In our tests,  
56 Mikado consistently performed better than alternative combin-  
57 ers, in particular when compared to the two meta-assemblers.  
58 The performance of StringTie-merge and CuffMerge on simu-  
59 lated data underscored the advantage of integrating assemblies  
60 from multiple sources as both methods generally improved re-  
61 call over input methods. However, this was accompanied by  
62 a drop in precision, most noticeably for CuffMerge, as assem-  
63 bly artefacts present in the input assemblies accumulated in  
64 the merged dataset. In contrast, the classification and filter-

ing based approach of EvidentialGene led to a more precise dataset, but at the cost of a decrease in recall. Mikado managed to balance both aspects, thus showing a better accuracy than any of the alternative approaches (*A. thaliana* +6.24%, *C. elegans* +7.66%, *D. melanogaster* +9.48%, *H. sapiens* +4.92% F1 improvement over the best alternative method). On real and simulated data, Mikado and EvidentialGene generally performed better than the two meta-assemblers, with an accuracy differential that ranged from moderate in *H. sapiens* (1.67 to 4.32%) to very marked in *A. thaliana* (14.87 to 29.58%). An important factor affecting the accuracy of the meta-assemblers with real data is the prevalence of erroneous transcript fusions that can result from incorrect read alignment, genomic DNA contamination or bona fide overlap between transcriptional units. Both StringTie-merge and CuffMerge were extremely prone to this type of error, as across the four species they generated on average 2.39 times the number of fusion genes compared to alternative methods (Figure 3b). Between the two selection based methods, EvidentialGene performed similarly to Mikado on real data but much worse on simulated data: its accuracy was on average 2 points lower than Mikado on real data, and 8.13 points lower in the simulations. This is mostly due to a much higher precision differential between the two methods in simulated data, with Mikado much better than EvidentialGene on this front (+8.95% precision on simulated data).

### Filtering lenient assemblies

Although our tests have been conducted using default parameters for the various assemblers, these parameters can be adjusted to alter the balance between precision and sensitivity according to the goal of the experiment. In particular, three of the assemblers we tested provide a parameter to filter out alternative isoforms with a low abundance. This parameter is commonly referred to as “minimum isoform fraction”, or MIF, and sets for each gene a minimum isoform expression threshold relative to the most expressed isoform. Only transcripts whose abundance ratio is greater than the MIF threshold are reported. Therefore, lowering this parameter will yield a higher number of isoforms per locus, retaining transcripts that are expressed at low levels and potentially increasing the number of correctly reconstructed transcripts. This improved recall is obtained at the cost of a drop in precision, as more and more incorrect splicing events are reported (Figure 4). Mikado can be applied on top of these very permissive assemblies to filter out spurious splicing events. In general, filtering with Mikado yielded transcript datasets that are more precise than those produced by the assemblers at any level of chosen MIF, or even when comparing the most relaxed MIF in Mikado with the most conservative in the raw assembler output (Figure 4).

**Figure 4. Performance of Mikado while varying the Minimum Isoform Fraction parameter.** Precision/recall plot at the gene and transcript level for CLASS and StringTie at varying minimum isoform fraction thresholds in *A. thaliana*, with and without applying Mikado. Dashed lines mark the F1 levels at different precision and recall values. CLASS sets MIF to 5% by default (red), while StringTie uses a slightly more stringent default value of 10% (cyan).

### Multi-sample transcript reconstruction

Unravelling the complexity of the transcriptome requires assessing transcriptional dynamics across many samples. Projects aimed at transcript discovery and genome annotation typically utilize datasets generated across multiple tissues

and experimental conditions to provide a more complete representation of the transcriptional landscape. Even if a single assembly method is chosen, there is often a need to integrate transcript assemblies constructed from multiple samples. StringTie-merge, CuffMerge and the recently published TACO [29] have been developed with this specific purpose in mind. The meta-assembly approach of these tools can reconstruct full-length transcripts when they are fragmented in individual assemblies, but as observed earlier, it is prone to creating fusion transcripts. TACO directly addresses this issue with a dedicated algorithmic improvement, ie change-point detection. This solution is based on fusion transcripts showing a dip in read coverage in regions of incorrect assembly; this change in coverage can then be used to identify the correct breakpoint. A limitation of the implementation in TACO is that it requires expression estimates to be encoded in the input GTFs, and some tools do not provide this information.

To assess the performance of Mikado for multi sample reconstruction, we individually aligned and assembled the twelve *A. thaliana* seed development samples from PRJEB7093, using the four single-sample assemblers described previously. The collection of twelve assemblies per tool was then integrated into a single set of assemblies, using different combinators. StringTie-merge and TACO could not be applied to the Trinity dataset, as they both require embedded expression data in the GTF files, which is not provided in the Trinity output. In line with the results published in the TACO paper [29], we observed a high rate of fusion events in both StringTie-merge and CuffMerge results (Figure 5b), which TACO reduced. However, none of these tools performed as well as EvidentialGene or Mikado, either in terms of accuracy, or in avoiding gene fusions (Figure 5). Mikado achieved the highest accuracy irrespective of the single sample assembler used, with an improvement in F1 over the best alternative method of +8.25% for Cufflinks assemblies, +2.23% in StringTie, +0.95% with CLASS2 and +6.65% for Trinity.

**Figure 5. Integrating assemblies coming from multiple samples.** a Mikado performs consistently better than other merging tools. StringTie-merge and TACO are not compatible with Trinity results and as such have not been included in the comparison. b Rate of recovered, missed, and fused genes for all the assembler and combiner combinations.

Transcript assemblies are commonly incorporated into evidence-based gene finding pipelines, often in conjunction with other external evidence such as cross species protein sequences, proteomics data or synteny. The quality of transcript assembly can therefore potentially impact on downstream gene prediction. To test the magnitude of this effect, we used the data from these experiments on *A. thaliana* to perform gene prediction with the popular MAKER annotation pipeline, using Augustus with default parameters for the species as a gene predictor. Our results (Supplementary Figure SF6) show that, as expected, an increased accuracy in the transcriptomic dataset leads to an increased accuracy in the final annotation. Importantly, MAKER was not capable of reducing the prevalence of gene fusion events present in the transcript assemblies. This suggests that *ab initio* Augustus predictions utilized by MAKER do not compensate for incorrect fusion transcripts that are provided as evidence, and stress the importance of pruning these mistakes from transcript assemblies before performing an evidence-guided gene prediction.

## Expansion to long read technologies

Short read technologies, due to their low per-base cost and extensive breadth and depth of coverage, are commonly utilised in genome annotation pipelines. However, like the previous generation Sanger ESTs, their short size requires the use of sophisticated methods to reconstruct the structure of the original RNA molecules. Third-generation sequencing technologies promise to remove this limitation, by generating full-length cDNA sequences. These new technologies currently offer lower throughput and are less cost effective, but have in recent studies been employed alongside short read technologies to define the transcriptome of species with large gene content [30, 31].

We tested the complementarity of the two technologies by sequencing two samples of a standard human reference RNA library with the leading technologies for both approaches, Illumina HiSeq for short-reads (250 bp, paired-end reads) and the Pacific Bioscience IsoSeq protocol for long reads. Given the currently higher per-base costs of long-read sequencing technologies, read coverage is usually much lower than for short read sequencing. We found many genes to be reconstructed by both platforms, but as expected given the lower sequencing depth there was a clear advantage for the Illumina dataset on genes with expression lower than 10 TPM (Supplementary Figure SF7). We verified the feasibility of integrating the results given by the different sequencing technologies by combining the long reads with the short read assemblies, either simply concatenating them, or by filtering them with EvidentialGene and Mikado (Supplementary Figure SF8). An advantage of Mikado over the two alternative approaches is that it allows to prioritise PacBio reads over Illumina assemblies, by giving them a slightly higher base score. In this analysis, we saw that even PacBio data on its own might require some filtering, as the original sample contains a mixture of whole and fragmented molecules, together with immature transcripts. Both Mikado and EvidentialGene are capable of identifying mature coding transcripts in the data, but Mikado shows a better recall and general accuracy rate, albeit at the cost of some precision. However, Mikado performed much better than EvidentialGene in filtering either the Illumina data on its own, or the combination of the two technologies. Although the filtering inevitably loses some of the real transcripts, the loss is compensated by an increased overall accuracy. Mikado performed better in this respect than EvidentialGene, as the latter did not noticeably improve in accuracy when given a combination of PacBio and Illumina data, rather than the Illumina data alone.

## Conclusions

Transcriptome assembly is a crucial component of genome annotation workflows, however, correctly reconstructing transcripts from short RNA-Seq reads remains a challenging task. Over recent years methods for both *de novo* and reference guided transcript reconstruction have accumulated rapidly. When combined with the large number of RNA-seq mapping tools deciding on the optimal transcriptome assembly strategy for a given organism and RNA-Seq data set (stranded/unstranded, polyA/ribodepleted) can be bewildering. In this article we showed that different assembly tools are complementary to each other; fully-reconstructing genes only partially reconstructed or missing entirely from alternative approaches. Similarly, when analysing multiple RNA-Seq samples, the complete transcript catalogue is often only obtained by collating together different assemblies. For a gene annotation project it is therefore typical to have multiple sets of transcripts, be they derived from alternative assemblers, different assembly parameters or arising from multiple samples. Our tool, Mikado,

provides a framework for integrating transcript assemblies exploiting the inherent complementarity of the data to produce a high-quality transcript catalogue. As Mikado is capable of accepting data from multiple standard file formats (GFF3, BED12, GTF), its applications are wider than those presented in this manuscript. Although it is not discussed fully here, the Daijin pipeline already supports additional aligners and assemblers, such as Scallop [32] or HISAT2 [7]. Similarly to what we have shown in this manuscript, Mikado can be fruitfully applied to assembly workflows based on these tools (Supplementary Figure SF9), and as such it provides a mechanism to integrate transcript assemblies from both new and established methods.

Rather than attempting to capture all transcripts, our approach aims to mimic the selective process of manual curation by evaluating and identifying a sub-set of transcripts from each locus. The criteria for selection can be configured by the user, enabling them to for example to penalise gene models with truncated ORFs, those with non-canonical splicing, targets for nonsense mediated decay or chimeric transcripts spanning multiple genes. Such gene models may represent bona fide transcripts (with potentially functional roles), but can also arise from aberrant splicing or, as seen from our simulated data, from incorrect read alignment and assembly. Mikado acts as a filter principally to identify coding transcripts with complete ORFs and is therefore in line with most reference annotation projects that similarly do not attempt to represent all transcribed sequences. Our approach is made possible by integrating the data on transcript structures with additional information generally not utilised by transcript assemblers such as similarity to known proteins, the location of open reading frames and information on the reliability of splicing junctions. This information aids Mikado in performing operations such as discarding spurious alternative splicing events, or detecting chimeric transcripts. This allows Mikado to greatly improve in precision over the original assemblies, with in general minimal drops in recall. Moreover, similarly to TACO, Mikado is capable of identifying and resolving chimeric assemblies, which negatively affect the precision of many of the most sensitive tools, such as StringTie or the two meta-assemblers Cuffmerge and StringTie-merge.

Genome annotation involves making choices about what genes and transcripts to include in the gene set, and different annotators will make different choices dependent on their own motivations and available data. The manually annotated genomes of human and *A. thaliana* exhibit clear differences. The annotation of the human genome is very comprehensive, with an average of five transcripts per gene; in contrast, the TAIR10 annotation of *A. thaliana* captures less splice variants, with most genes being annotated with a single, coding isoform. This reflects not only potentially real differences in the extent of alternative splicing between the species but also differences in the annotation approach, with the human gene set capturing, in addition to coding splice variants, transcripts lacking annotated ORFs and those with retained introns or otherwise flagged as targets for nonsense mediated decay. Neither the more comprehensive nor the more conservative approach is necessarily the most correct; the purpose of the annotation, i.e. how it will be used by the research community, and the types of supporting data will guide the selection process. Mikado provides a framework to apply different selection criteria, therefore, similarly to *ab initio* programs where the results are heavily dependent on the initial training set, also for Mikado the results will depend on the experimenter's choices. In the online documentation, we provide a discussion on how to customise scoring files according to the needs of the experimenter, and a tutorial to guide through its creation (<http://mikado.readthedocs.io/en/latest/Tutorial/Adapting.html>)

Our experiments show that Mikado can aid genome annotation by generating a set of high quality transcript assemblies across a range of different scenarios. Rather than having to identify the best aligner/assembly combination for every project, Mikado can be used to integrate assemblies from multiple methods, with our approach reliably identifying the most accurate transcript reconstructions and allowing the user to tailor the gene set to their own requirements. It is also simple to incorporate assemblies from new tools even if the new method is not individually the most accurate approach. Given the challenges associated with short-read assembly it is desirable (when available) to integrate these with full-length cDNA sequences. Mikado is capable of correctly integrating analyses coming from different assemblers and technologies, including mixtures of Illumina and PacBio data. Our tool has already been employed for such a task on the large, repetitive genome of *Triticum aestivum* [31], where it was instrumental in selecting a set of gene models from over ten million transcript assemblies and PacBio IsoSeq reads. The consolidated dataset returned by Mikado was almost thirty times smaller than the original input dataset, and this polishing was essential both to ensure a high-quality annotation and to reduce the running times of downstream processes.

In conclusion, Mikado is a flexible tool which is capable of handling a plethora of data types and formats. Its novel selection algorithm was shown to perform well in model organisms and was central in the genome annotation pipeline of various species [33, 31, 34]. Its deployment should provide genome annotators with another powerful tool to improve the accuracy of data for subsequent *ab initio* training and evidence-guided gene prediction.

## Methods

### Input datasets

For *C. elegans*, *D. melanogaster* and *H. sapiens*, we retrieved from the European Nucleotide Archive (ENA) the raw reads used for the evaluation in [18], under the Bioproject PRJEB4208. We further selected and downloaded a publicly available strand-specific RNA-Seq dataset for *A. thaliana*, PRJEB7093. Congruently with the assessment in [18], we used genome assemblies and annotations from EnsEMBL v. 70 for all metazoan species, while for *A. thaliana* we used the TAIR10 version. For all species, we simulated reads using the input datasets as templates. Reads were trimmed with TrimGalore v0.4.0 [35] and aligned onto the genome with Bowtie v1.1.2 [36] and HISAT v2.0.4 [7]. The HISAT alignments were used to calculate the expression levels for each transcript using Cufflinks v2.2.1, while the Bowtie mappings were used to generate an error model for the SPANKI Simulator v.0.5.0 [37]. The transcript coverages and the error model were then used to generate simulated reads, at a depth of 10X for *C. elegans* and *D. melanogaster* and 3X for *A. thaliana* and *H. sapiens*. A lower coverage multiplier was applied to the latter species to have a similar number of reads for all four datasets, given the higher sequencing depth in the *A. thaliana* dataset and the higher number of reference transcripts in *H. sapiens*. cDNA sequences for *A. thaliana* were retrieved from the NCBI Nucleotide database on the 21st of April 2017, using the query:

```
‘‘Arabidopsis’’ [Organism] OR arabidopsis[All  
Fields]) AND ‘‘Arabidopsis thaliana’’[porgn]  
AND biomol\_mrna [PROP]
```

For the second experiment on *H. sapiens*, we sequenced two samples of the Stratagene Universal Human Reference RNA (catalogue ID#740000), which consists of a mixture of RNA de-

rived from ten different cell lines. One sample was sequenced on an Illumina HiSeq2000 and the second on a Pacific Biosciences RSII machine. Sequencing runs were deposited in ENA, under the project accession code PRJEB22606.

### Preparation and sequencing of Illumina libraries

The libraries for this project were constructed using the NEXTflex™ Rapid Directional RNA-Seq Kit (PN: 5138-08) with the NEXTflex™ DNA Barcodes – 48 (PN: 514104) diluted to 6 µm. The library preparation involved an initial QC of the RNA using Qubit DNA (Life technologies Q32854) and RNA (Life technologies Q32852) assays as well as a quality check using the PerkinElmer GX with the RNA assay (PN:CLS960010)

1 µg of RNA was purified to extract mRNA with a poly-A pull down using biotin beads, fragmented and first strand cDNA was synthesised. This process reverse transcribes the cleaved RNA fragments primed with random hexamers into first strand cDNA using reverse transcriptase and random primers. The second strand synthesis process removes the RNA template and synthesizes a replacement strand to generate ds-cDNA. The ends of the samples were repaired using the 3' to 5' exonuclease activity to remove the 3' overhangs and the polymerase activity to fill in the 5' overhangs creating blunt ends. A single 'A' nucleotide was added to the 3' ends of the blunt fragments to prevent them from ligating to one another during the adapter ligation reaction. A corresponding single 'T' nucleotide on the 3' end of the adapter provided a complementary overhang for ligating the adapter to the fragment. This strategy ensured a low rate of chimera formation. The ligation of a number indexing adapters to the ends of the DNA fragments prepared them for hybridisation onto a flow cell. The ligated products were subjected to a bead based size selection using Beckman Coulter XP beads (PN: A63880). As well as performing a size selection this process removed the majority of un-ligated adapters. Prior to hybridisation to the flow cell the samples were PCR'd to enrich for DNA fragments with adapter molecules on both ends and to amplify the amount of DNA in the library. Directionality is retained by adding dUTP during the second strand synthesis step and subsequent cleavage of the uridine containing strand using Uracil DNA Glycosylase. The strand that was sequenced is the cDNA strand. The insert size of the libraries was verified by running an aliquot of the DNA library on a PerkinElmer GX using the High Sensitivity DNA chip (PerkinElmer CLS760672) and the concentration was determined by using a High Sensitivity Qubit assay and q-PCR.

The constructed stranded RNA libraries were normalised and equimolar pooled into two pools. The pools were quantified using a KAPA Library Quant Kit Illumina/ABI (KAPA KK4835) and found to be 6.71 nM and 6.47 nM respectively. A 2 nM dilution of each pool was prepared with NaOH at a final concentration of 0.1N and incubated for 5 minutes at room temperature to denature the libraries. 5 µl of each 2 nM dilution was combined with 995 µl HT1 (Illumina) to give a final concentration of 10 pM. 135 µl of the diluted and denatured library pool was then transferred into a 200 µl strip tube, spiked with 1% PhiX Control v3 (Illumina FC-110-3001) and placed on ice before loading onto the Illumina cBot with a Rapid v2 Paired-end flow-cell and HiSeq Rapid Duo cBot Sample Loading Kit (Illumina CT-403-2001). The flow-cell was loaded on a HiSeq 2500 (Rapid mode) following the manufacturer's instructions with a HiSeq Rapid SBS Kit v2 (500 cycles) (Illumina FC-402-4023) and HiSeq PE Rapid Cluster Kit v2 (Illumina PE-402-4002). The run set up was as follows: 251 cycles/7 cycles(index)/251 cycles utilizing HiSeq Control Software 2.2.58 and RTA 1.18.64. Reads in .bcl format were demultiplexed based on the 6bp Illumina index by CASAVA 1.8 (Illumina), allowing for a one base-pair mismatch per library, and converted to FASTQ format by bcl2fastq (Illumina).

## Preparation and sequencing of PacBio libraries

The Iso-Seq libraries were created starting from 1 µg of human total RNA and full-length cDNA was then generated using the SMARTer PCR cDNA synthesis kit (Clontech, Takara Bio Inc., Shiga, Japan) following PacBio recommendations set out in the Iso-Seq method (<http://goo.gl/1Vo3Sd>). PCR optimisation was carried out on the full-length cDNA using the KAPA HiFi PCR kit (Kapa Biosystems, Boston USA) and 12 cycles were sufficient to generate the material required for ELF size selection. A timed setting was used to fractionate the cDNA into 12 individual sized fractions using the SageELF (Sage Science Inc., Beverly, USA), on a 0.75% ELF Cassette. Prior to further PCR, the ELF fractions were equimolar pooled into the following sized bins: 0.7–2kb, 2–3kb, 3–5kb and > 5kb. PCR was repeated on each sized bin to generate enough material for SMRTbell library preparation, this was completed following PacBio recommendations in the Iso-Seq method. The four libraries generated were quality checked using Qubit Fluorometer 2.0 and sized using the Bioanalyzer HS DNA chip. The loading calculations for sequencing were completed using the PacBio Binding Calculator v2.3.1.1 (<https://github.com/PacificBiosciences/BindingCalculator>). The sequencing primer was used from the SMRTbell Template Prep Kit 1.0 and was annealed to the adapter sequence of the libraries. Each library was bound to the sequencing polymerase with the DNA/Polymerase Binding Kit v2 and the complex formed was then bound to Magbeads in preparation for sequencing using the MagBead Kit v1. Calculations for primer and polymerase binding ratios were kept at default values. The libraries were prepared for sequencing using the PacBio recommended instructions laid out in the binding calculator. The sequencing chemistry used to sequence all libraries was DNA Sequencing Reagent Kit 4.0 and the Instrument Control Software version was v2.3.0.0.140640. The libraries were loaded onto PacBio RS II SMRT Cells 8Pac v3; each library was sequenced on 3 SMRT Cells. All libraries were run without stage start and 240 minute movies per cell. Reads for the four libraries was extracted using SMRT Pipe v2.3.3, following the instructions provided by the manufacturer at [https://github.com/PacificBiosciences/cDNA\\_primer](https://github.com/PacificBiosciences/cDNA_primer).

## Alignments and assemblies

Reads from the experiments were aligned using STAR v2.4.1c and TopHat v2.0.14. For STAR, read alignment parameters for all species were as follows:

```
--outFilterMismatchNmax 4 --alignSJoverhangMin 12 --
  alignSJBoverhangMin 12 --outFilterIntronMotifs
  RemoveNoncanonical --alignEndsType EndToEnd --
  alignTranscriptsPerReadNmax 100000 --
  alignIntronMin MININTRON --alignIntronMax
  MAXINTRON --alignMatesGapMax MAXINTRON
```

whereas for TopHat2 we used the following parameters:

```
-r 50 -p 4 --min-anchor-length 12 --max-multihits 20
  --library-type fr-unstranded -i MININTRON -I
  MAXINTRON
```

The parameters “MININTRON” and “MAXINTRON” were varied for each species, as follows:

- *A. thaliana*: minimum 20, maximum 10000
- *C. elegans*: minimum 30, maximum 15,000
- *D. melanogaster*: minimum 20, maximum 10,000
- *H. sapiens*: minimum 20, maximum 10,000

Each dataset was assembled using four different tools:

CLASS v 2.12, Cufflinks 2.1.1, StringTie v. 1.03, and Trinity r20140717. Command lines for the tools were as follows:

- CLASS: we executed this tools through a wrapper included in Mikado, `class_run.py`, with command line parameters `-F 0.05`
- Cufflinks: `-u -F 0.05`; for the *A. thaliana* dataset, we further specified `-library-type fr-firststrand`.
- StringTie: `-m 200 -f 0.05`
- Trinity: `-genome_guided_max_intron MAXINTRON` (see above)

Trinity assemblies were mapped against the genome using GMAP v20141229 [38], with parameters `-n 0 -min-trimmed-coverage=0.70 -min-identity=0.95`. For simulated data, we elected to use a more modern version of Trinity (v.2.3.2) as the older version was unable to assemble transcripts correctly for some of the datasets. For assembling separately the samples in PRJBE7093, we used Cufflinks (v.2.2.1) and StringTie v1.2.3, with default parameters.

## Mikado analyses

All analyses were run with Mikado 1.0.1, using Daijin to drive the pipeline. For each species, we built a separate reference protein dataset, to be used for the BLAST comparison (see Table ST4). We used NCBI BLASTX v2.3.0 [39], with a maximum evalue of  $10e^{-7}$  and a maximum number of targets of 10. Open reading frames were predicted using TransDecoder 3.0.0 [9]. Scoring parameters for each species can be found in Mikado v1.0.1, at <https://github.com/luventurini/mikado/tree/master/Mikado/configuration/scoring> with a name scheme of `species_name_scoring.yaml` (eg. “*athaliana\_scoring.yaml*” for *A. thaliana*). The same scoring files were used for all runs, both with simulated and real data. Filtered junctions were calculated using Portcullis v1.0 beta5, using default parameters.

Mikado was instructed to look for models with – among other features – a good UTR/CDS proportion (adjusted per species), homology to known proteins, and a high proportion of validated splicing junctions. We further instructed Mikado to remove transcripts that do not meet minimum criteria such as having at least a validated splicing junction if any is present in the locus, and a minimum transcript length or CDS length. The configuration files are bundled with the Mikado software as part of the distribution.

## Details on the algorithms of Mikado

The Mikado pipeline is divided into three distinct phases.

### Mikado prepare

Mikado prepare is responsible for bringing together multiple annotations into a single GTF file. This step of the pipeline is capable of handling both GTF and GFF3 files, making it adaptable to use data from most assemblers and cDNA aligners currently available. Mikado prepare will not just uniform the data format, but will also perform the following operations:

- It will optionally discard any model below a user-specified size (default 200 base pairs).
- It will analyse the introns present in each model, and verify their canonicity. If a model is found to contain introns from both strands, it will be discarded by default, although the user can decide to override this behaviour and keep such models in. Each multiexonic transcript will be tagged with this information, making it possible for Mikado to understand the number of canonical splicing events present in a



transcript later on.

iii. Mikado will also switch the strand of multiexonic transcripts if it finds that their introns are allocated to the wrong strand, and it will strip the strand information from any monoexonic transcript coming from non-strand specific assemblies

iv. Finally, Mikado will sort the models, providing a coordinate-ordered GTF file as output, together with a FASTA file of all the cDNAs that have been retained.

*Mikado prepare* uses temporary SQLite databases to perform the sorting operation with a limited amount of memory. As such, it is capable of handling millions of transcripts from multiple assemblies with the memory found on a regular modern desktop PC (lower than 8GB of RAM).

#### *Mikado serialise*

*Mikado serialise* is the part of the pipeline whose role is to collect all additional data on the models, and store it into a standard database. Currently Mikado is capable of handling the following types of data:

- i. FASTAs, ie the cDNA sequences produced by Mikado prepare, and the genome sequence.
- ii. Genomic BED files, containing the location of trusted introns. Usually these are either output directly from the aligners themselves (eg the “junctions.bed” file produced by TopHat) or derived from the alignment using a specialised program such as Portcullis.
- iii. Transcriptomic BED or GFF3 files, containing the location of the ORFs on the transcripts. These can be calculated with any program chosen by the user. We highly recommend using a program capable of indicating more than one ORF per transcript, if more than one is present, as Mikado relies on this information to detect and solve chimeric transcripts. Both TransDecoder and Prodigal have such capability.
- iv. Homology match files in XML format. These can be produced either by BLAST+ or by DIAMOND (v 0.8.7 and later) with the option “-outfmt 5”.

*Mikado serialise* will try to keep the memory consumption at a minimum, by limiting the amount of maximum objects present in memory (the threshold can be specified by the user, with the default being at 20,000). XML files can be analysed in parallel, so Mikado serialise can operate more efficiently if BLAST or DIAMOND runs are performed by pre-chunking the cDNA FASTA file and producing corresponding multiple output files.

*Mikado serialise* will output a database with the structure in Supplementary Figure SF10.

#### *Mikado pick*

*Mikado pick* selects the final transcript models and outputs them in GFF3 format. In contrast with many *ab initio* predictors, currently Mikado does not provide an automated system to learn the best parameters for a species. Rather, the choice of what types of models should be prioritised for inclusion in the final annotation is left to the experimenter, depending on her needs and goals. For the experiments detailed in this article, we configured Mikado to prioritise complete protein-coding models, and to apply only a limited upfront filtering to transcripts. A stricter upfront hard-filtering of transcripts, for example involving discarding any monoexonic transcript without sufficient homology support, might have yielded a more precise collated annotation at the price of discarding any potentially novel monoexonic genes. Although we provide the scoring files used for this paper in the software distribution, we encourage users to inspect them and adjust

them to their specific needs. As part of the workflow, Mikado also produces tabular files with all the metrics calculated for each transcript, and the relative scores. It is therefore possible for the user to use this information to adjust the scoring model. The GFF3 files produced by Mikado comply with the formal specification of GFF3, as defined by the Sequence Ontology and verified using GenomeTools v.1.5.9 or later. Earlier versions of GenomeTools would not validate completely Mikado files due to a bug in their calculation of CDS phases for truncated models, see issue #793 on GenomeTools github: <https://github.com/genometools/genometools/issues/793>.

## Integration of multiple transcript assemblies

Evidential Gene v20160320 [23] was run with default parameters, in conjunction with CDHIT v4.6.4 [40]. Models selected by the tools were extracted from the combined GTFs using a mikado utility, mikado grep, and further clustered into gene loci using gffread from Cufflinks v2.2.1. StringTie-merge and Cuffmerge were run with default parameters. Limitedly to the experiment regarding the integration of assemblies from multiple samples, we used TACO v0.7. For all these three tools, we used their default isoform fraction parameter. The GTFs produced by the TACO meta-assemblies were reordered using a custom script (“sort\_taco\_assemblies.py”), present in the script repository.

## MAKER runs

We used MAKER v2.31.8 [41], in combination with Augustus 3.2.2 [42], for all our runs. GFFs and GTFs were converted to a match/match\_part format for MAKER using the internal script of the tool “cufflinks2gff3.pl”. MAKER was run using MPI and default parameters; the only input files were the different assemblies produced by the tested tools.

## Comparison with reference annotations

All comparisons have been made using Mikado compare v1.0.1. Briefly, Mikado compare creates an interval tree structure of the reference annotation, which is used to find matches in the vicinity of any given prediction annotation. All possible matches are then evaluated in terms of nucleotide, junction and exonic recall and precision; the best one is reported as the best match for each prediction in a transcript map (TMAP) file. After exhausting all possible predictions, Mikado reports the best match for each reference transcript in the “reference map” (REFMAP) file, and general statistics about the run in a statistics file. Mikado compare is capable of detecting fusion genes in the prediction, defined as events where a prediction transcripts intersects at least one transcript per gene from at least two different genes, with either a junction in common with the transcript, or an overlap over 10% of the length of the shorter between the prediction or the reference transcripts. Fusion events are reported using a modified class code, with a “f,” prepending it. For a full introduction to the program, we direct the reader to the online documentation at <https://mikado.readthedocs.io/en/latest/Usage/Compare.html>.

### Creation of reference and filtered datasets for the comparisons

For *A. thaliana*, we filtered the TAIR10 GFF3 to retain only protein coding genes. For the other three species, reference GTF files obtained through Ensembl were filtered using the “clean\_reference.py” python script present in the “Assemblies” folder of the script repository (see the “Script availability” section). The YAML configuration files used for each

species can be found in the “Biotypes” folder. The retained models constitute our reference transcriptome for comparisons.

For all our analyses, we deemed a transcript reconstructable if all of its splicing junctions (if any) and all its internal bases could be covered by at least one read. As read coverage typically decreases or disappears at the end of transcripts, we used the mikado utility “trim” to truncate the terminal UTR exons until their lengths reaches the maximum allowed value (50 bps for our analysis) or the beginning of the CDS section is found. BEDTools v. 2.27 beta (commit 6114307 [43]) was then used to calculate the coverage of each region. Detected junctions were calculated using Portcullis, specifically using the BED file provided at the end of Portcullis junction analysis step. The “get\_filtered\_reference.py” was then used to identify reconstructable transcripts.

For simulated datasets, we used the BAM file provided by SPANKI to derive the list of reconstructable transcripts. For the non-simulated datasets, we used the union of transcripts found to be reconstructable from each of the alignment methods. The utility “mikado util grep” was used to extract the relevant transcripts from the reference files. Details of the process can be found in the two snakemakes “compare.snakefile” and “compare\_simulations.snakefile” present in the “Snakemake” directory of the script repository.

### Calculation of comparison statistics

“Mikado compare” was used to assess the similarity of each transcript set against both the complete reference, and the reference filtered for reconstructable transcripts. Precision statistics were calculated from the former, while recall statistics were calculated from the latter.

## Script availability

Scripts and configuration files used for the analyses in this paper can be accessed at <https://github.com/luventurini/mikado-analysis>.

## Customization and further development

Mikado allows to customize its run mode through the use of detailed configuration files. There are two basic configuration files: one is dedicated to the scoring system, while the latter contains run-specific details. The scoring file is divided in four different sections, and allows the user to specify which transcripts should be filtered out outright at any of the stages during picking, and how to prioritise transcripts through a scoring system. Details on the metrics, and on how to write a valid configuration file, can be found in the SI and at the online documentation (<http://mikado.readthedocs.io/en/latest/Algorithms.html>).

These configuration files are intended to be used across runs, akin to how standard parameter sets are re-used in *ab initio* gene prediction programs, e.g. Augustus. The second configuration file contains parameters pertaining each run, such as the position of the input files, the type of database to be used, or the desired location for output files. As such, they are meant to be customised by the user for each experiment. Mikado provides a command, “mikado configure”, which will generate this configuration file automatically when given basic instructions.

## Availability of source code and requirements

- Project name: Mikado

- Project home page: <http://github.com/luventurini/mikado>
- Operating system(s): Linux
- Programming language: Python3
- Other requirements: SnakeMake, BioPython, NumPY, SciPY, Scikit-learn, BLAST+ or DIAMOND, Prodigal or TransDecoder, Portcullis
- Available through: PyPI, bioconda, SciCruch (SCR\_016159)
- License: GNU LGPL3

## Availability of supporting data and materials

The datasets supporting the conclusions of this article are included within the article (and its additional files). Transcript assemblies and gene annotation produced during the current study are available in a FigShare repository, together with the source code of the version of our software tool used to perform all experiments in this study, at this permanent address: [https://figshare.com/projects/Leveraging\\_multiple\\_transcriptome\\_assembly\\_methods](https://figshare.com/projects/Leveraging_multiple_transcriptome_assembly_methods). The sequencing runs analysed for this article can be found on ENA, under the accession codes PRJEB7093 (for *A. thaliana*) and PRJEB4028 (for the other three species). The human sequencing data of our parallel Illumina and PacBio experiment can be found under the accession code PRJEB22606. Mikado is present on GitHub, at the address <https://github.com/luventurini/mikado>. Many of the scripts used to control the pipeline executions, together with the scripts used to create the charts present in the article, can be found in the complementary repository <https://github.com/luventurini/mikado-analysis>. All sequencing runs and reference sequence datasets used for this study are publicly available. Please see the section “Input datasets” for details.

## Declarations

### List of abbreviations

If abbreviations are used in the text they should be defined in the text at first use, and a list of abbreviations should be provided in alphabetical order.

### Ethical Approval (optional)

Not applicable

### Consent for publication

Not applicable

### Competing Interests

The authors declare that they have no competing interests.

## Funding

This work was strategically funded by the BBSRC, Core Strategic Programme Grant BB/CSP17270/1 at the Earlham Institute and by a strategic LOLA Award (BB/J003743/1). Next-generation sequencing and library construction was delivered via the BBSRC National Capability in Genomics (BB/CCG1720/1) at Earlham Institute by members of the Genomics Pipelines Group.

## Author's Contributions

The lead author of this manuscript is L.V and corresponding author is D.S. We describe contributions for all authors to this paper using the CReDIT taxonomy. The order of authors for each task represents their relative contribution. Conceptualization: D.S and L.V.; Methodology: L.V. and D.S; Software: L.V and D.M; Validation: L.V, S.C., G.K and D.S; Writing - Original Draft: L.V. and D.S.; Writing - Review & Editing: L.V, D.S, D.M., S.C., G.K; Visualisation: L.V. and S.C.; Supervision: D.S.

## Acknowledgements

This research was supported in part by the NBI Computing infrastructure for Science (CiS) group.

## References

- Li B, Dewey CN. RSEM: accurate transcript quantification from RNA-Seq data with or without a reference genome. *BMC Bioinformatics* 2011;12(1):323. <http://bmcbioinformatics.biomedcentral.com/articles/10.1186/1471-2109-12-323>.
- Roberts A, Pachter L. Streaming fragment assignment for real-time analysis of sequencing experiments. *Nature methods* 2013 jan;10(1):71-3. <http://www.pubmedcentral.nih.gov/articlerender.fcgi?artid=388011>
- Patro R, Mount SM, Kingsford C. Sailfish enables alignment-free isoform quantification from RNA-seq reads using lightweight algorithms. *Nature Biotechnology* 2014 apr;32(5):462-464. <http://www.nature.com/doi/10.1038/nbt.2862>.
- Bray NL, Pimentel H, Melsted P, Pachter L. Near-optimal probabilistic RNA-seq quantification. *Nature Biotechnology* 2016 apr;34(5):525-527. <http://www.nature.com/doi/10.1038/nbt.3519>.
- Kim D, Pertea G, Trapnell C, Pimentel H, Kelley R, Salzberg SL. TopHat2: accurate alignment of transcriptomes in the presence of insertions, deletions and gene fusions. *Genome Biology* 2013 apr;14(4):R36. <http://www.ncbi.nlm.nih.gov/pubmed/23618408><http://genomebiology.com/doi/10.1186/gb-2013-14-4-r36>
- Dobin A, Davis CA, Schlesinger F, Drenkow J, Zaleski C, Jha S, et al. STAR: ultrafast universal RNA-seq aligner. *Bioinformatics* 2013 jan;29(1):15-21. <http://bioinformatics.oxfordjournals.org/cgi/doi/10.1093/bioinformatics/btt059>
- Kim D, Langmead B, Salzberg SL. HISAT: a fast spliced aligner with low memory requirements. *Nature Methods* 2015 mar;12(4):357-360. <http://www.nature.com/doi/10.1038/nmeth.3317>.
- Trapnell C, Williams BA, Pertea G, Mortazavi A, Kwan G, van Baren MJ, et al. Transcript assembly and quantification by RNA-Seq reveals unannotated transcripts and isoform switching during cell differentiation. *Nature Biotechnology* 2010 may;28(5):511-515. <http://www.nature.com/doi/10.1038/nbt.1621>.
- Grabherr MG, Haas BJ, Yassour M, Levin JZ, Thompson DA, Amit I, et al. Full-length transcriptome assembly from RNA-Seq data without a reference genome. *Nature Biotechnology* 2011 may;29(7):644-52. <http://www.nature.com/doi/10.1038/nbt.1883><http://www.ncbi.nlm.nih.gov/pubmed/2152440>
- Pertea M, Pertea GM, Antonescu CM, Chang TC, Mendell JT, Salzberg SL. StringTie enables improved reconstruction of a transcriptome from RNA-seq reads. *Nature Biotechnology* 2015 feb;33(3):290-295. <http://www.nature.com/doi/10.1038/nbt.3122>.
- Song L, Sabuncian S, Florea L. CLASS2: accurate and efficient splice variant annotation from RNA-seq

- reads. *Nucleic Acids Research* 2016 jun;44(10):e98-e98. <http://nar.oxfordjournals.org/content/44/10/e98><http://nar.oxfordjournals.org/content/44/10/e98>
- Schulz MH, Zerbino DR, Vingron M, Birney E. Oases: Robust de novo RNA-seq assembly across the dynamic range of expression levels. *Bioinformatics* 2012 feb;28(8):1086-1092. <http://www.ncbi.nlm.nih.gov/pubmed/22368243>.
- Chang Z, Li G, Liu J, Zhang Y, Ashby C, Liu D, et al. Bridger: a new framework for de novo transcriptome assembly using RNA-seq data. *Genome Biology* 2015;16(1):30. <http://genomebiology.com/2015/16/1/30>.
- Pertea M, Kim D, Pertea GM, Leek JT, Salzberg SL. Transcript-level expression analysis of RNA-seq experiments with HISAT, StringTie and Ballgown. *Nature Protocols* 2016 aug;11(9):1650-1667. <http://www.nature.com/doi/10.1038/nprot.2016.095>.
- Garber M, Grabherr MG, Guttman M, Trapnell C. Computational methods for transcriptome annotation and quantification using RNA-seq. *Nature Methods* 2011 may;8(6):469-477. <http://www.nature.com/doi/10.1038/nmeth.1613>.
- Hornett EA, Wheat CW. Quantitative RNA-Seq analysis in non-model species: assessing transcriptome assemblies as a scaffold and the utility of evolutionary divergent genomic reference species. *BMC Genomics* 2012;13(1):361. <http://bmcgenomics.biomedcentral.com/articles/10.1186/1471-2164-13-361>.
- Vijay N, Poelstra JW, Künstner A, Wolf JBW. Challenges and strategies in transcriptome assembly and differential gene expression quantification. A comprehensive in silico assessment of RNA-seq experiments. *Molecular Ecology* 2013 feb;22(3):620-634. <http://doi.wiley.com/10.1111/mec.12014>.
- Steijger T, Abril JF, Engström PG, Kokocinski F, Abril JF, Akerman M, et al. Assessment of transcript reconstruction methods for RNA-seq. *Nature Methods* 2013 nov;10(12):1177-1184. <http://www.nature.com/doi/10.1038/nmeth.2714>.
- Smith-Unna R, Boursnell C, Patro R, Hibberd JM, Kelly S. TransRate: reference-free quality assessment of de novo transcriptome assemblies. *Genome Research* 2016 aug;26(8):1134-1144. <http://genome.cshlp.org/lookup/doi/10.1101/gr.196469.115>
- Li B, Fillmore N, Bai Y, Collins M, Thomson JA, Stewart R, et al. Evaluation of de novo transcriptome assemblies from RNA-Seq data. *Genome Biology* 2014 dec;15(12):553. <http://genomebiology.biomedcentral.com/articles/10.1186/s13059-014-0553-5>
- Haas BJ, Delcher AL, Mount SM, Wortman JR, Smith RKJ, Hannick LI, et al. Improving the Arabidopsis genome annotation using maximal transcript alignment assemblies. *Nucleic Acids Research* 2003 oct;31(19):5654-5666. <http://nar.oxfordjournals.org/lookup/doi/10.1093/nar/gkg770><http://www.pub>
- Haas BJ, Papanicolaou A, Yassour M, Grabherr M, Blood PD, Bowden J, et al. De novo transcript sequence reconstruction from RNA-seq using the Trinity platform for reference generation and analysis. *Nature Protocols* 2013 jul;8(8):1494-1512. <http://www.nature.com/nprot/journal/v8/n8/abs/nprot.2013.084.html><http://www.pub>
- Gilbert DG. Gene-omes built from mRNA-seq not genome DNA. In: 7th Annual Arthropod Genomics Symposium; 2013. p. 47405. <http://arthropods.eugenes.org/EvidentialGene/about/Evidence2013poster.pdf>
- Engström PG, Steijger T, Sipos B, Grant GR, Kahles A, Alioto T, et al. Systematic evaluation of spliced alignment programs for RNA-seq data. *Nature Methods* 2013 nov;10(12):1185-1191. <http://www.nature.com/doi/10.1038/nmeth.2722>.
- Mapleson D, Venturini L, Kaithakottil G, Swarbreck D. Efficient and accurate detection of splice junctions from RNAseq with Portcullis. *bioRxiv* 2017

Jan;<http://biorxiv.org/content/early/2017/11/10/217620.abstract>.dec;<http://www.ncbi.nlm.nih.gov/pubmed/24306534>.

26. Lunter G, Goodson M. Stampy: A statistical algorithm for sensitive and fast mapping of Illumina sequence reads. *Genome research* 2011 jun;21(6):936–9. <http://www.ncbi.nlm.nih.gov/pubmed/20980556>.
27. Roberts A, Pimentel H, Trapnell C, Pachter L. Identification of novel transcripts in annotated genomes using RNA-Seq. *Bioinformatics* 2011 sep;27(17):2325–2329. <http://www.ncbi.nlm.nih.gov/pubmed/21697122><http://bioinformatics.oxfordjournals.org/cgi/doi/10.1093/bioinformatics/btr355>.
28. Nakasugi K, Crowhurst R, Bally J, Waterhouse P. Combining Transcriptome Assemblies from Multiple De Novo Assemblers in the Allo-Tetraploid Plant *Nicotiana benthamiana*. *PLoS ONE* 2014 mar;9(3):e91776. <http://dx.plos.org/10.1371/journal.pone.0091776>.
29. Niknafs YS, Pandian B, Iyer HK, Chinnaiyan AM, Iyer MK. TACO produces robust multisample transcriptome assemblies from RNA-seq. *Nature Methods* 2016 nov;14(1):68–70. <http://www.nature.com/doifinder/10.1038/nmeth.4078>.
30. Jiao Y, Peluso P, Shi J, Liang T, Stitzer MC, Wang B, et al. Improved maize reference genome with single-molecule technologies. *Nature* 2017 jun;<http://www.nature.com/doifinder/10.1038/nature22971>.
31. Clavijo BJ, Venturini L, Schudoma C, Accinelli GG, Kaithakottil G, Wright J, et al. An improved assembly and annotation of the allohexaploid wheat genome identifies complete families of agronomic genes and provides genomic evidence for chromosomal translocations. *Genome Research* 2017 may;27(5):885–896. <http://genome.cshlp.org/lookup/doi/10.1101/gr.217117.116>.
32. Shao M, Kingsford C. Accurate assembly of transcripts through phase-preserving graph decomposition. *Nature biotechnology* 2017;35(12):1167.
33. Sollars ESA, Harper AL, Kelly LJ, Sambles CM, Ramirez-Gonzalez RH, Swarbreck D, et al. Genome sequence and genetic diversity of European ash trees. *Nature* 2016 dec;541(7636):212–216. <http://www.nature.com/doifinder/10.1038/nature20786>.
34. IWGSC, IWGSC v1.0 RefSeq Annotations; 2017. <https://wheat-urgi.versailles.inra.fr/Seq-Repository/Annotations>.
35. BabrahamLab, Trim Galore; 2014. [http://www.bioinformatics.babraham.ac.uk/projects/trim\\_galore](http://www.bioinformatics.babraham.ac.uk/projects/trim_galore).
36. Langmead B, Trapnell C, Pop M, Salzberg SL. Ultrafast and memory-efficient alignment of short DNA sequences to the human genome. *Genome biology* 2009;10(3):R25. <http://www.ncbi.nlm.nih.gov/pubmed/19261174>.
37. Sturgill D, Malone JH, Sun X, Smith HE, Rabinow L, Samson ML, et al. Design of RNA splicing analysis null models for post hoc filtering of *Drosophila* head RNA-Seq data with the splicing analysis kit (Spanki). *BMC Bioinformatics* 2013;14(1):320. <http://bmcbioinformatics.biomedcentral.com/articles/10.1186/1471-2105-14-320>.
38. Wu TD, Watanabe CK. GMAP: a genomic mapping and alignment program for mRNA and EST sequences. *Bioinformatics* 2005 may;21(9):1859–1875. <http://www.ncbi.nlm.nih.gov/pubmed/15728110><http://bioinformatics.oxfordjournals.org/cgi/doi/10.1093/bioinformatics/bti310>.
39. Altschul SF, Madden TL, Schäffer AA, Zhang J, Zhang Z, Miller W, et al. Gapped BLAST and PSI-BLAST: a new generation of protein database search programs. *Nucleic acids research* 1997 sep;25(17):3389–402. <http://nar.oxfordjournals.org/cgi/content/abstract/25/17/3389><http://www.ncbi.nlm.nih.gov/pubmed/9254694>.
40. Li W, Godzik A. Cd-hit: a fast program for clustering and comparing large sets of protein or nucleotide sequences. *Bioinformatics* 2006 jul;22(13):1658–9. <http://www.ncbi.nlm.nih.gov/pubmed/16731699>.
41. Campbell M, Law M, Holt C, Stein J, Moghe G, Hufnagel D, et al. MAKER-P: a tool-kit for the rapid creation, management, and quality control of plant genome annotations. *Plant physiology* 2013
42. Stanke M, Keller O, Gunduz I, Hayes A, Waack S, Morgenstern B. AUGUSTUS: Ab initio prediction of alternative transcripts. *Nucleic Acids Research* 2006 jul;34(WEB. SERV. ISS.):W435–W439. <https://academic.oup.com/nar/article-lookup/doi/10.1093/nar/gkl200>.
43. Quinlan AR, Hall IM. BEDTools: a flexible suite of utilities for comparing genomic features. *Bioinformatics* 2010;26(6):841–842. <http://bioinformatics.oxfordjournals.org/cgi/doi/10.1093/bioinformatics/btq173>.

## Additional Files

### Additional file 1 — Supplemental Information

Additional information for the main article, including supplemental figures and tables.

### Additional file 2 — Reconstruction statistics for the input methods

This Excel file contains precision, recall and F1 statistics for the various methods tested.

Figure 1

[Click here to access/download;Figure;Region.pdf](#)

# Reference annotation

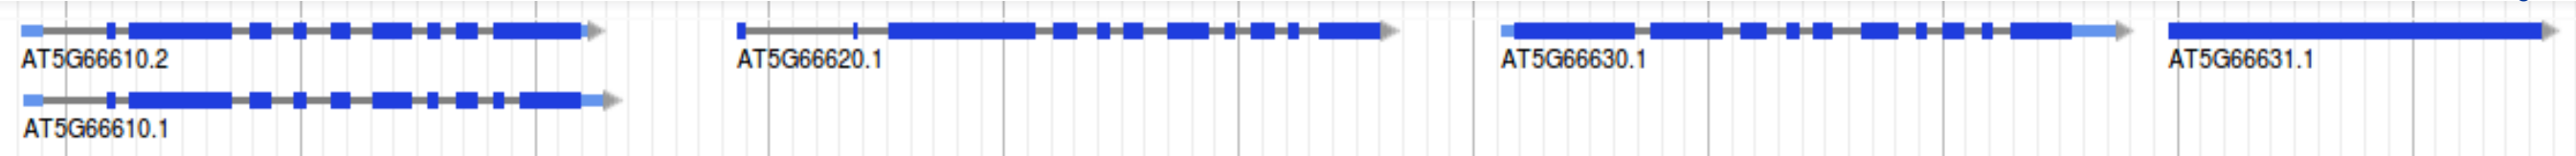

# Mikado

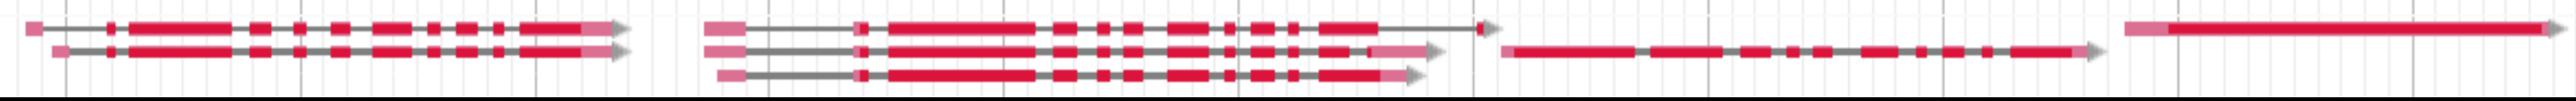

# CLASS2

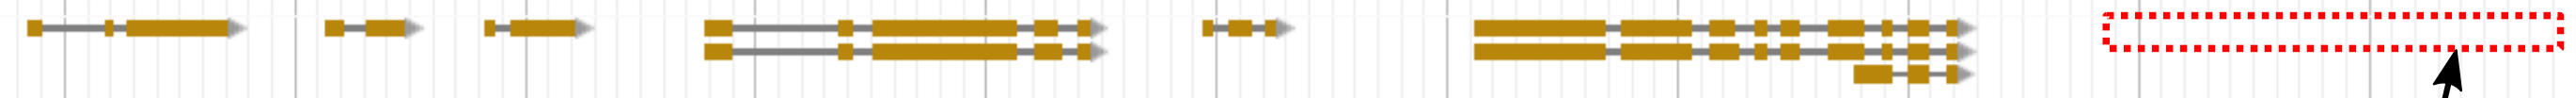

# Cufflinks

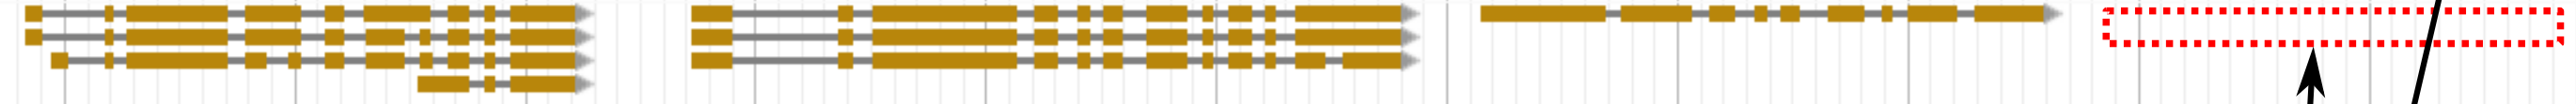

# StringTie

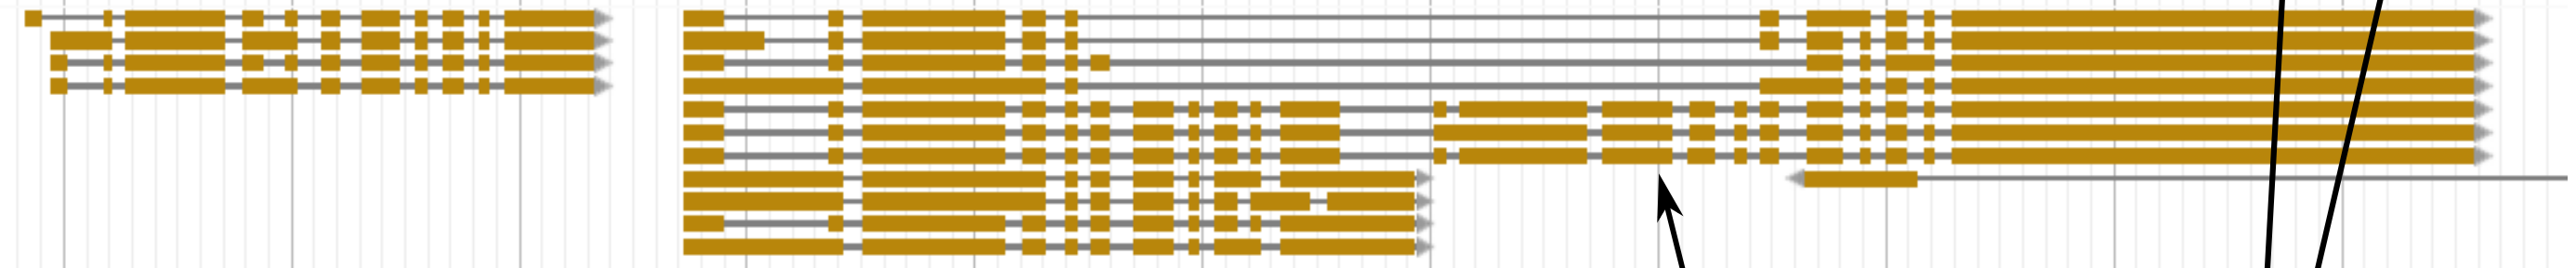

# Trinity

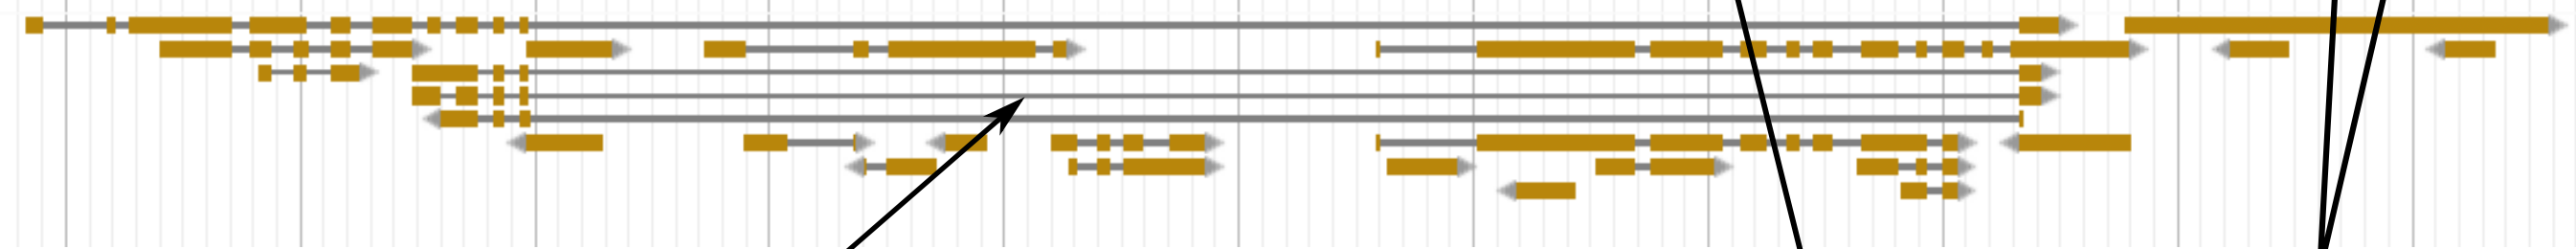

Artefactual gene fusion

Artefactual gene fusions

Missed gene

Figure 2

For each sample

[Click here to access/download;Figure;Pipeline.pdf](#)

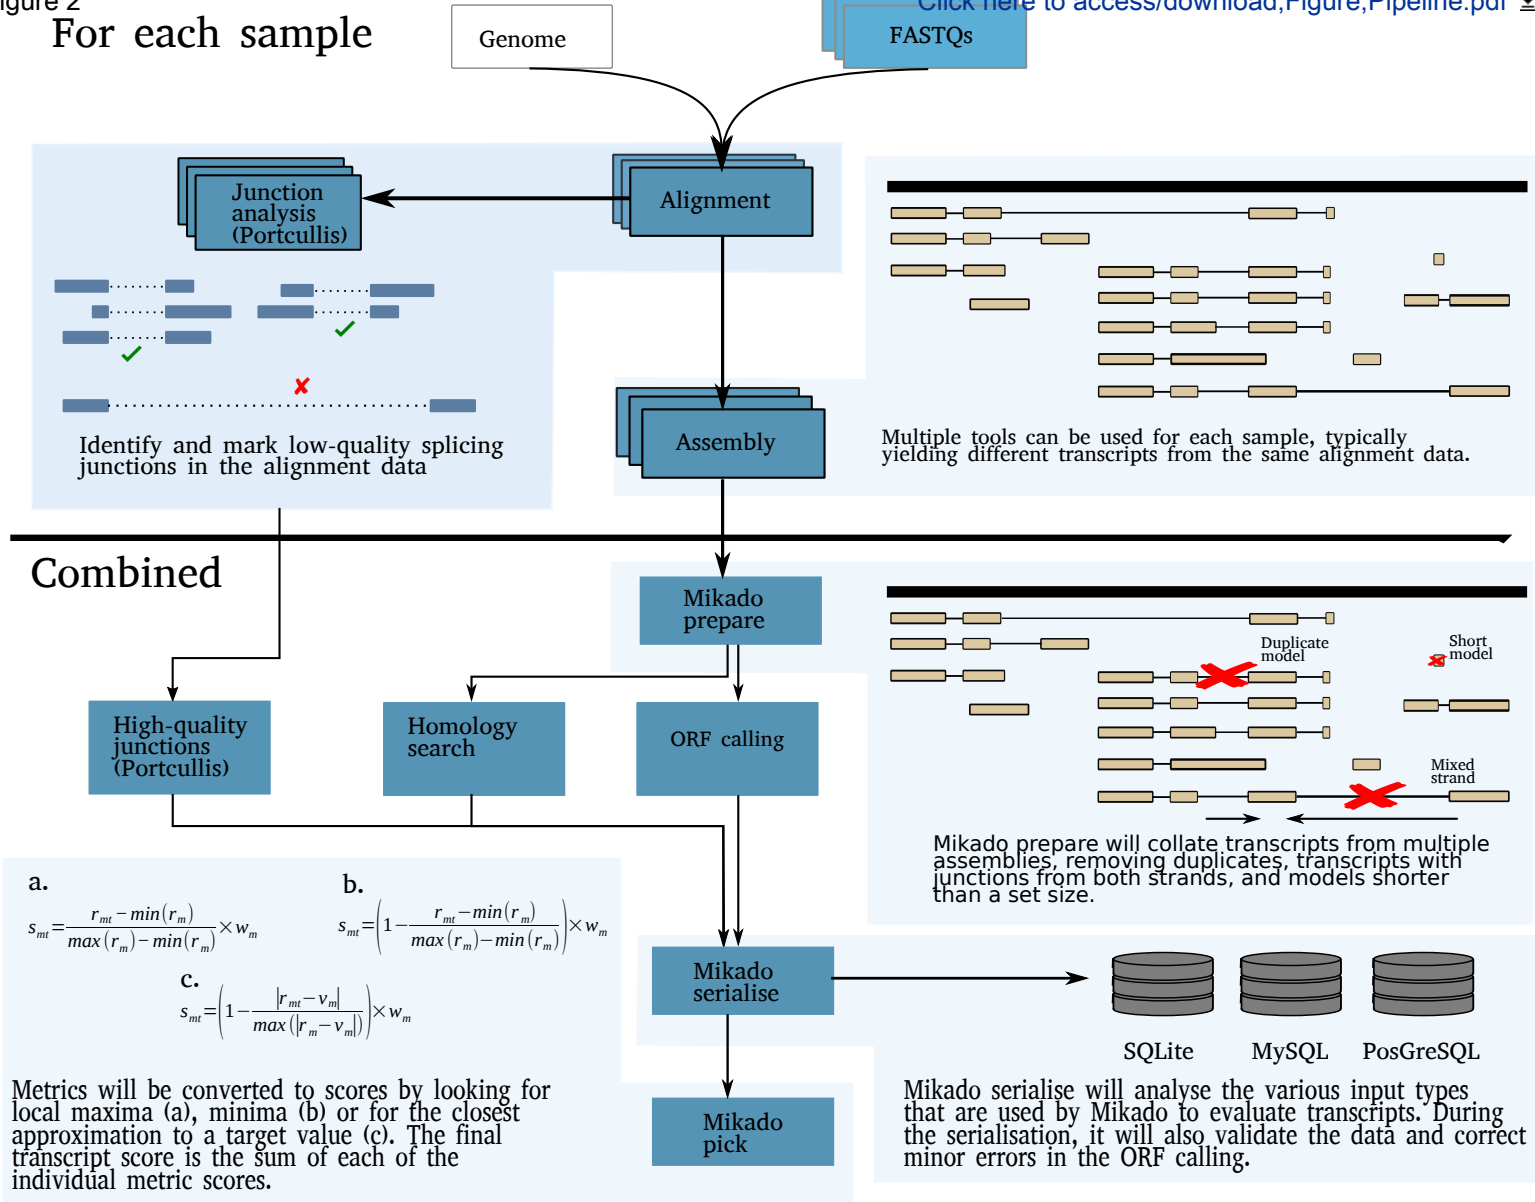

a. 
$$s_{mt} = \frac{r_{mt} - \min(r_m)}{\max(r_m) - \min(r_m)} \times w_m$$

b. 
$$s_{mt} = \left(1 - \frac{r_{mt} - \min(r_m)}{\max(r_m) - \min(r_m)}\right) \times w_m$$

c. 
$$s_{mt} = \left(1 - \frac{|r_{mt} - v_m|}{\max(|r_m - v_m|)}\right) \times w_m$$

Metrics will be converted to scores by looking for local maxima (a), minima (b) or for the closest approximation to a target value (c). The final transcript score is the sum of each of the individual metric scores.

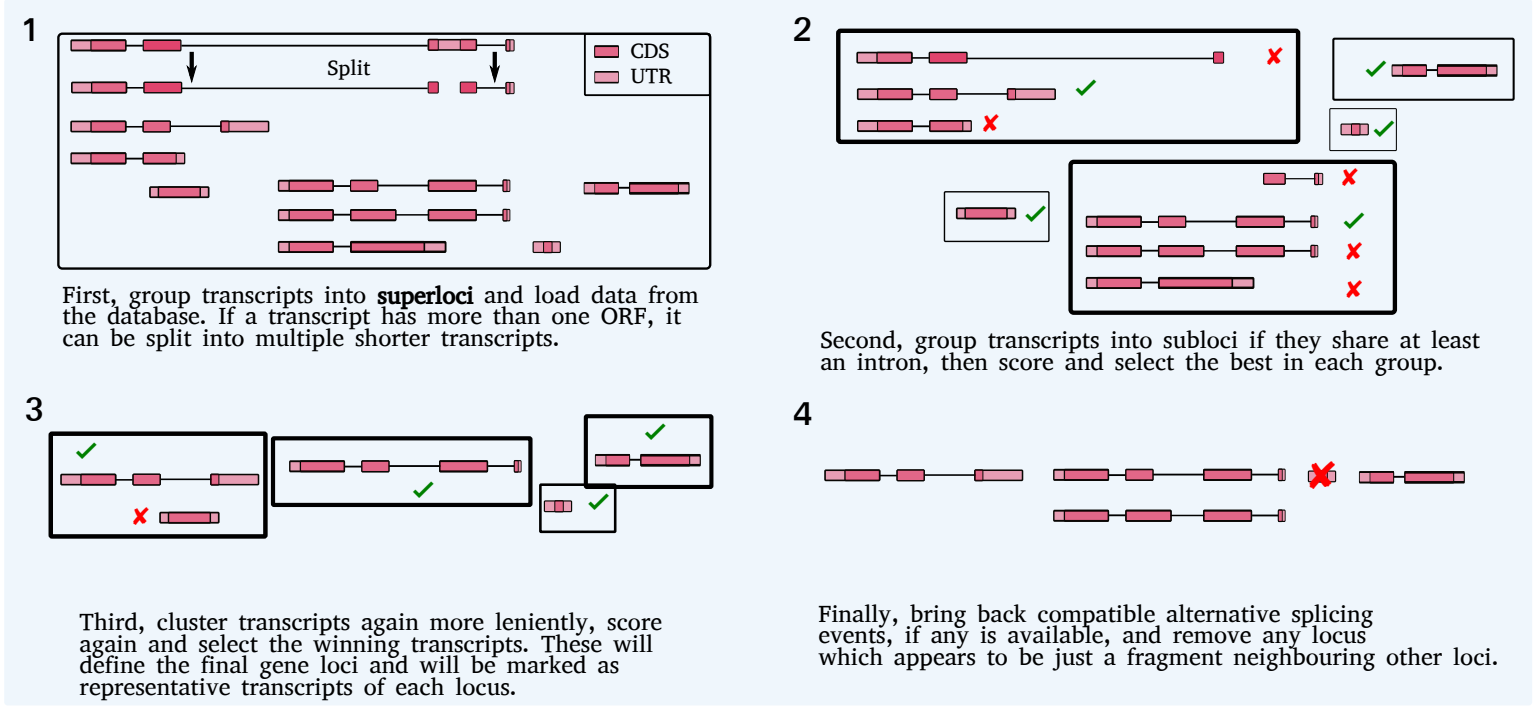

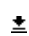

a

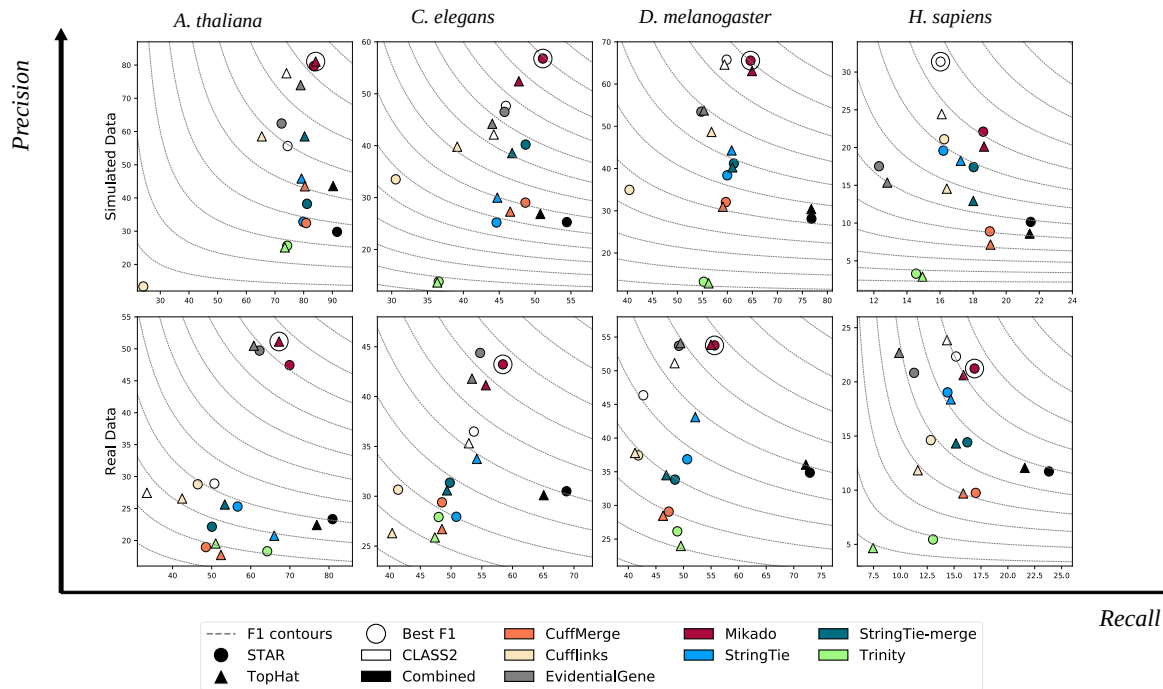

b

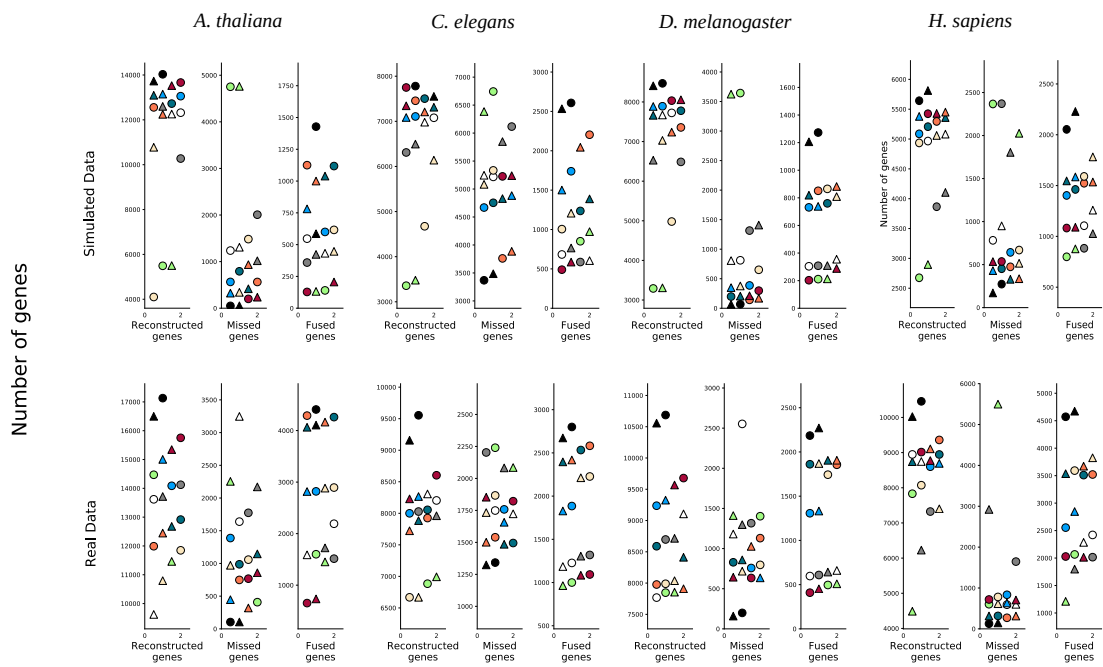

Figure 4

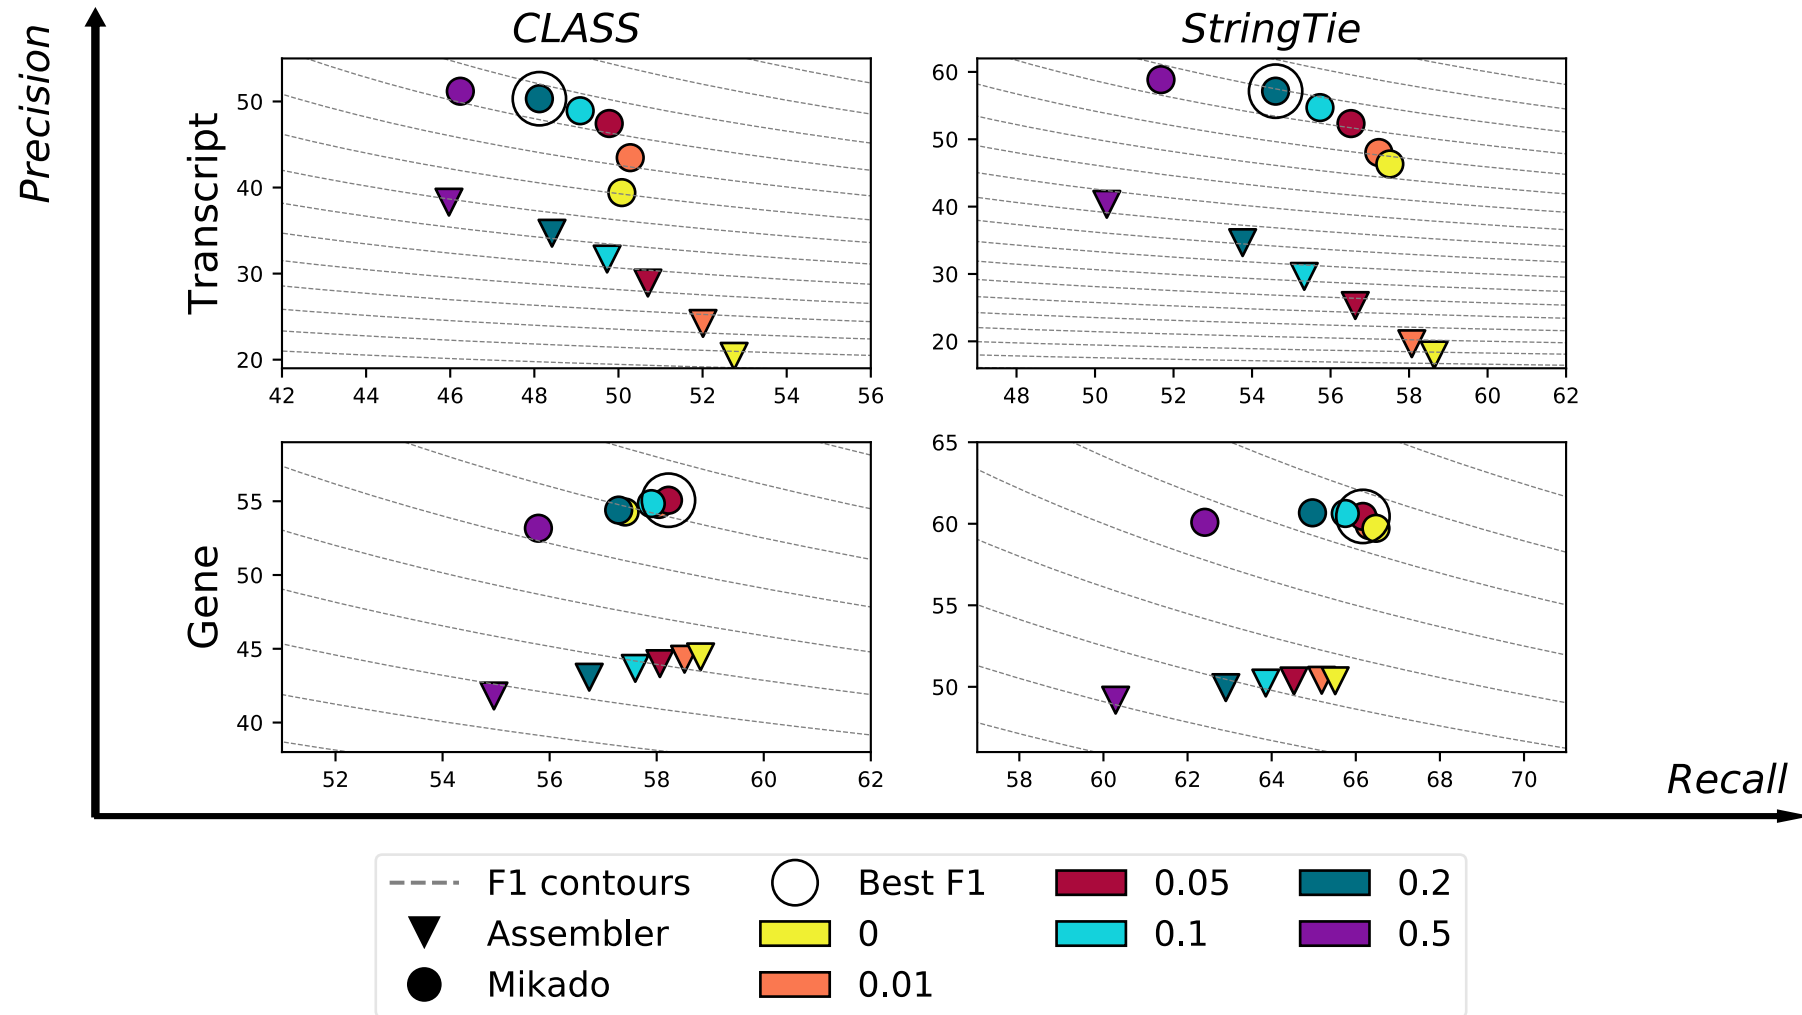



a

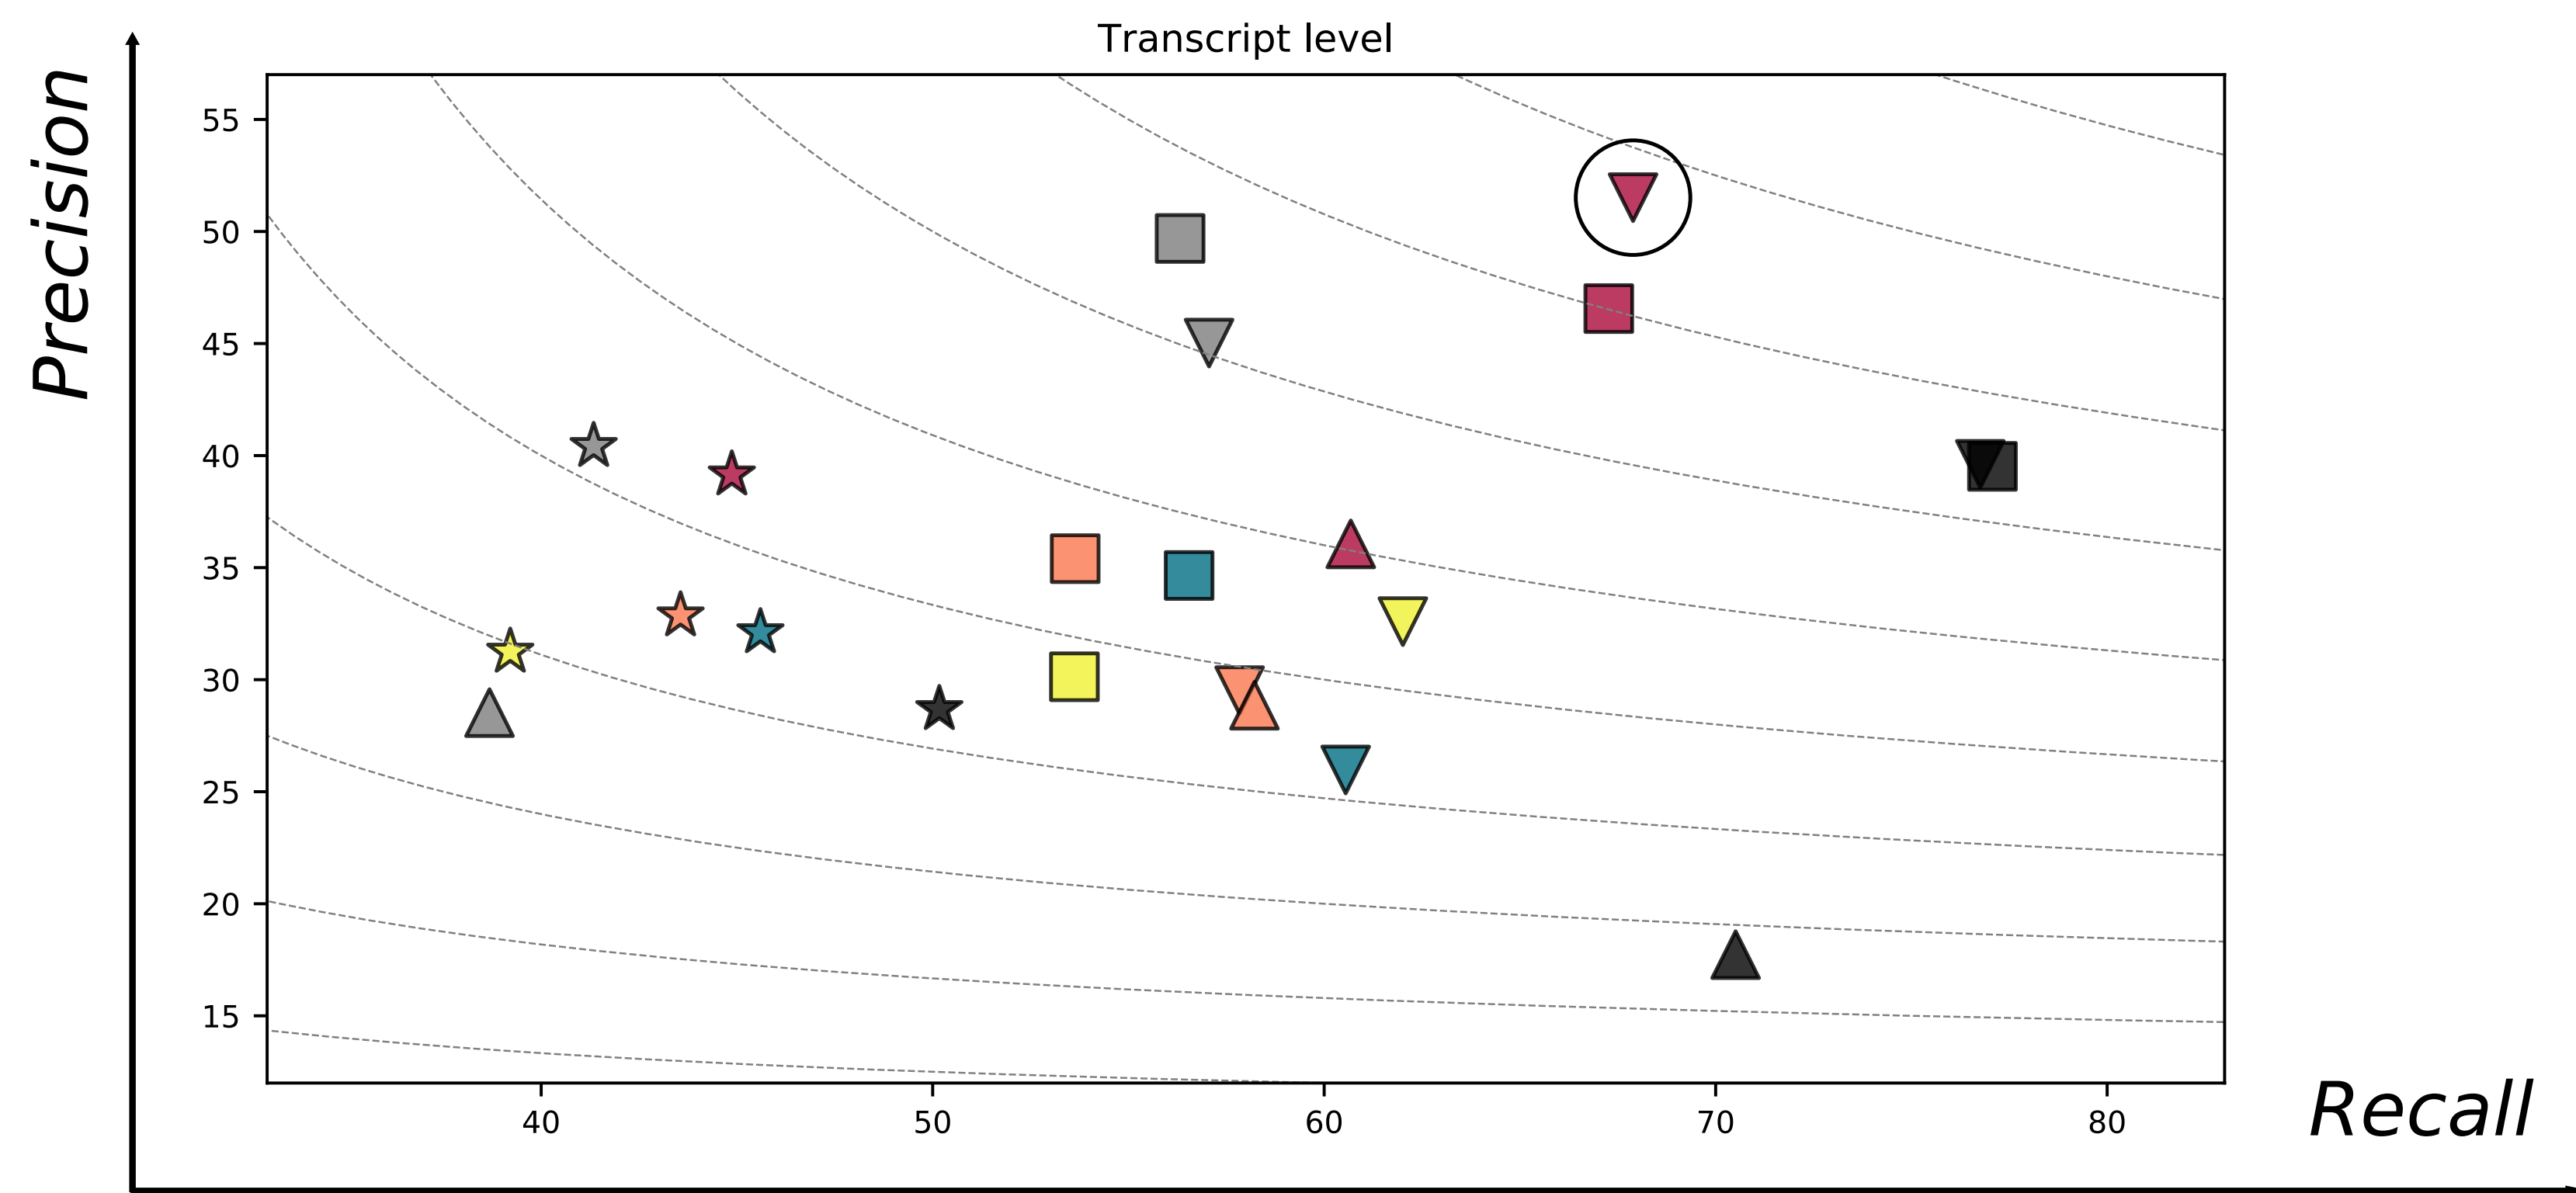

b

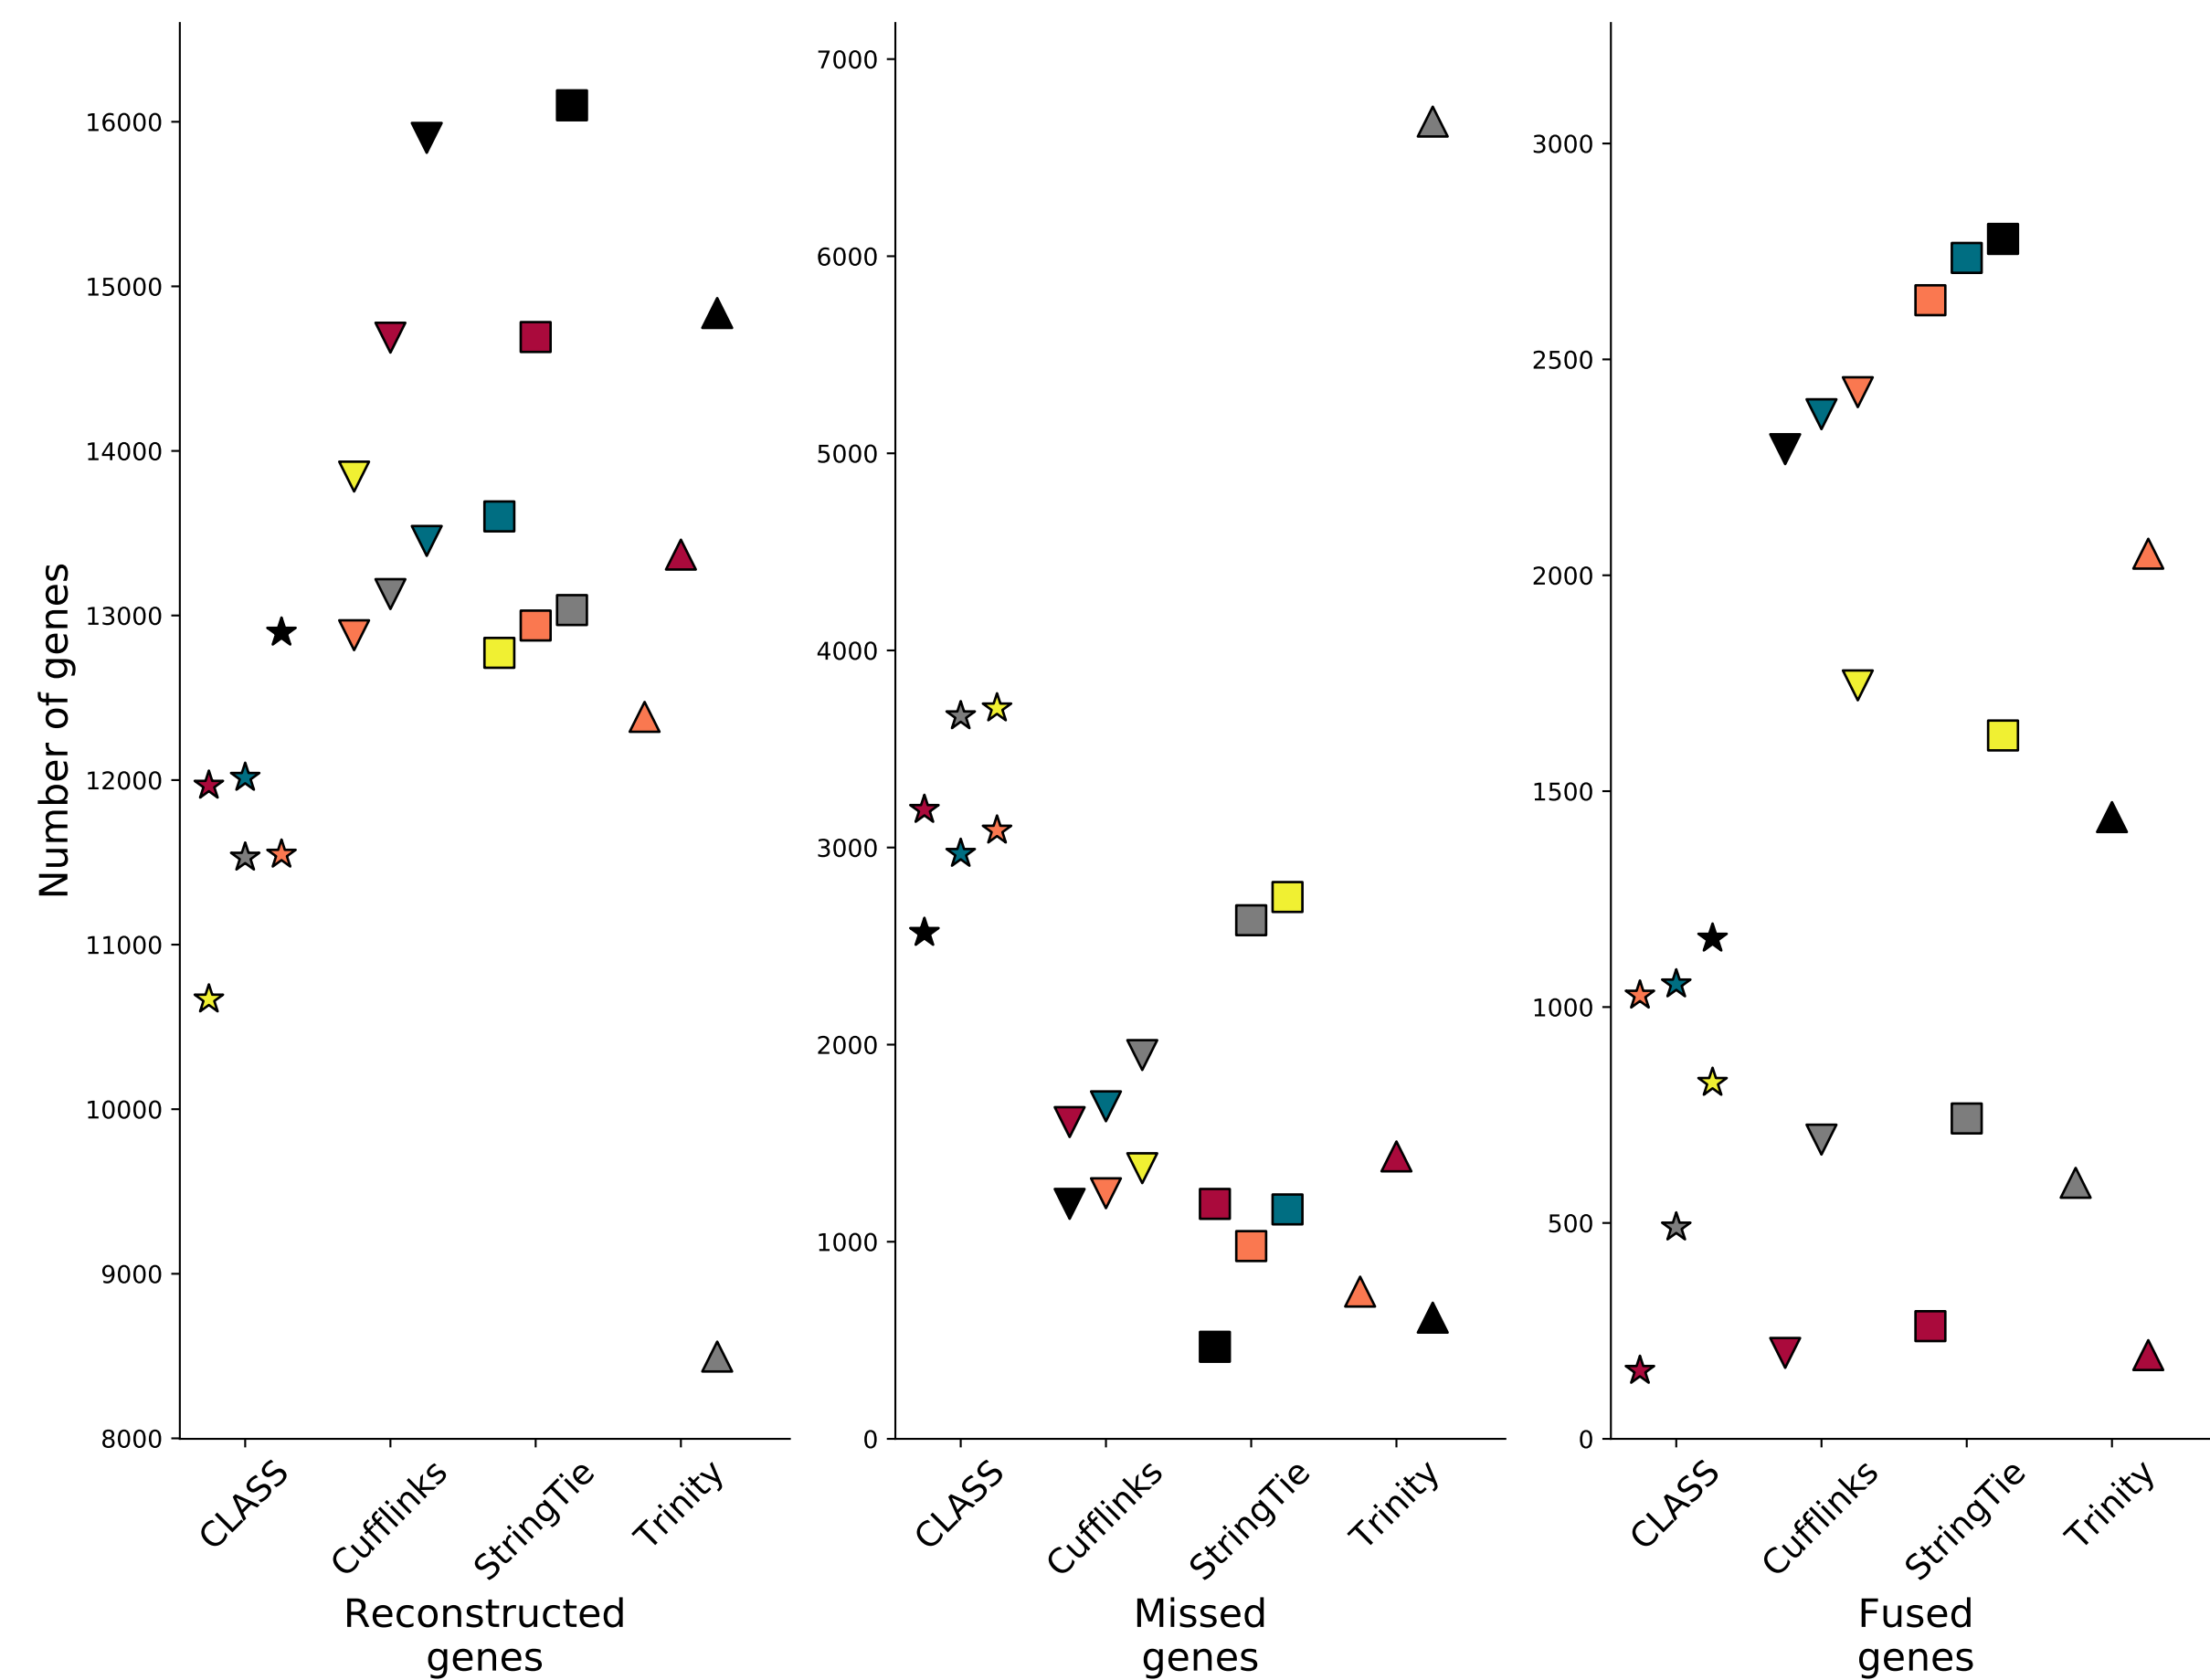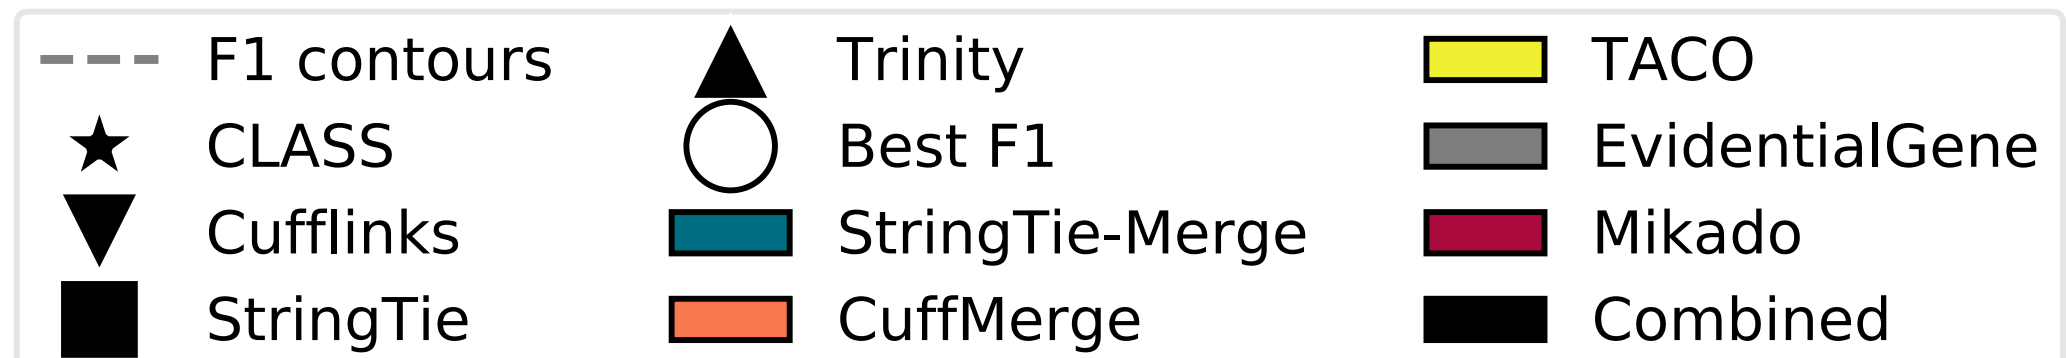



Click here to access/download  
**Supplementary Material**  
supplemental.pdf



Click here to access/download  
**Supplementary Material**  
Assembly\_stats.xlsx



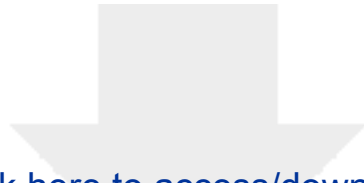

Click here to access/download  
**Supplementary Material**  
gigascience\_article-diff47ad17.pdf

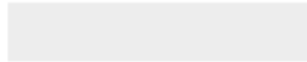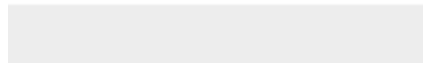



Click here to access/download  
**Supplementary Material**  
supplemental-diff47ad17.pdf





Click here to access/download  
**Supplementary Material**  
gigascience\_article.pdf



Supplement: giy093_giga-d-18-00017_revision_1.pdf [file giy093_giga-d-18-00017_revision_1.pdf]
